# Supplementary material for: Human WDR5 promotes breast cancer growth and metastasis via KMT2-independent translation regulation
Source: eLife. 2022 Aug 31;11:e78163. doi: 10.7554/eLife.78163 (PMC9584608; doi:10.7554/eLife.78163)
Supplement: Supplementary file 1. — (a) List of hairpin sequences and knockdown efficiency. (b) Results of in vivo and in vitro screen. l2fc, Log2 fold change (c) Shared differentially expressed genes (DEGs) after WDR5 knockdown in LM2, BrM3, and BoM. l2fc, Log2 fold change; padj, adjusted p value. (d) Enriched pathways of differentially expressed genes (DEGs) after WDR5 knockdown in LM2, BrM3, BoM, or all three cell lines (common). Enriched pathways, significance, combined score, and overlapping genes are shown. (e) List of cloning oligos. (f) List of primers used for RT-qPCR. (g) List of barcode qPCR primers. [file elife-78163-supp1.xlsx]

## Sheet: Supplementary File 1a
Supplementary File 1a. List of hairpin sequences and knockdown efficiency.
Gene	Screened	GIPZ.ID	Hairpin.sequence	shRNA.knockdown.efficiency
ATF2		V2LHS_150897	GAGTCCATTTGAGAATGAA	0.24
BAZ2A		V3LHS_337722	TGGGAGAAGTCTGTCAACA	0.72
BAZ2A		V2LHS_58222	CAGATGATCTTGGAGGAAA	0.34
BAZ2A		V2LHS_58226	CCCTGCTTAGCACACCTAA	0.2
BAZ2A	TRUE	V3LHS_337721	AGATGATAGTCAAACATCA	0.2
BAZ2B		V2LHS_190887	CTGCCAAGGAGTTTATTAA	1.1
BAZ2B		V3LHS_342456	CCAATGTTGCTTCAAGTAA	1.1
BAZ2B		V2LHS_58158	GCAGTACCCTGAAGTAATA	0.96
BAZ2B		V2LHS_58157	GCTTTGATGTGAATATTGA	0.8
BAZ2B		V2LHS_58159	GCCACAATATGAGGAAGTA	0.79
BAZ2B	TRUE	V3LHS_342455	AGGATGTTGCTATTATTGA	0.63
BRD1		V2LHS_85958	CAGAGTACCACTTATTTAA	1.2
BRD1		V3LHS_380236	TCCTGTGTACTACAAGTTC	1.1
BRD1		V2LHS_86028	GTTAGAAGCTCAAGGGTAT	0.98
BRD1		V3LHS_380233	CGAAACTATAGACAAGTTA	0.91
BRD1		V3LHS_380237	TGACCTACGCTCAAGCTCA	0.82
BRD1		V3LHS_380234	CGGTGGAAACTGACATGCT	0.71
BRD2		V3LHS_644813	TGAGATTGTTTGTTCTAAT	1.2
BRD2	TRUE	V2LHS_196812	CTATGCTTGGCCTTTCTAT	0.53
BRD3		V2LHS_184616	CAGCATTTCTGGATGGATA	0.76
BRD3		V2LHS_184621	CTGCGGTGATTCAATTAGA	0.66
BRD3		V3LHS_638807	CCCGACGAGATAGAAATTG	0.52
BRD3	TRUE	V2LHS_85545	CACGCATTGTCCTTGTCAT	0.39
BRD9		V3LHS_391456	AGCAAGAAAGTGGTGGACG	1.1
BRD9		V2LHS_135643	GATGCAGAATAATTCAGTA	0.55
BRD9	TRUE	V2LHS_271552	CTGGATATTCAATGATAAT	0.35
BRPF1		V2LHS_41837	GTGCAAAGATGATCAAGAA	0.93
BRPF1	TRUE	V2LHS_41836	GACTACATCTGGCTGGATA	0.8
BRPF3		V3LHS_310920	CGGAAGAGAGAGAAGCTCA	1.1
BRPF3		V2LHS_102259	CAGACAGGGTCCTGGAGAA	0.99
BRPF3		V3LHS_310922	AGGATGAGAAGACAAGTGC	0.83
BRPF3		V3LHS_310923	AAGATGAGTTTGAAGCAGA	0.77
BRPF3		V2LHS_102256	CTATTGAGGGCATTGACAA	0.72
BRPF3	TRUE	V3LHS_310921	CGCACATCAGTCCTCTTCA	0.58
CARM1		V3LHS_319978	AGGACAAGATCGTTCTTGA	0.8
CARM1		V3LHS_319980	GAGGTCTTGGTGAAGAGTA	0.58
CARM1		V3LHS_319976	CCGACCAACACCATGCACT	0.32
CARM1		V2LHS_256535	GATAGAAATCCCATTCAAA	0.32
CARM1	TRUE	V2LHS_201315	GGAAACATGTTTCCTACCA	0.31
CBX7		V3LHS_412319	TGGTCACTTTCAAAGAACT	0.94
CBX7		V3LHS_412322	ACCATTATCATTCTCCTCT	0.92
CBX7	TRUE	V3LHS_412318	AGCTGGTTCTGGGAGTTAA	0.78
CBX8		V3LHS_404018	AGATGTAAATATGTTATTT	1
CBX8		V2LHS_247367	CATGGAATACCTCGTGAAA	0.95
CBX8		V2LHS_58819	GTGAGCTTGGCATAGTGAT	0.95
CBX8		V3LHS_404019	AGTTTTTGTTGGAAAGATT	0.68
CBX8	TRUE	V3LHS_404017	AGATTATCTCTAGAGTTAT	0.68
CREBBP		V2LHS_24251	GGATGAATATTATCACTTA	0.61
CREBBP		V3LHS_358935	AGCAAGAATGCCAAGAAGA	0.56
CREBBP	TRUE	V3LHS_358934	AGGTGCTGAACATTCTCAA	0.54
CSNK2A1		V3LHS_645576	AGTAGTTCAGTCATAAAAA	0.51
CSNK2A1		V3LHS_355933	ACCAGCTGGTTCGAAAATT	0.5
CSNK2A1	TRUE	V3LHS_639850	AGAGTTTACACAGATGTTA	0.48
CTSL		V3LHS_344299	AGGCGATGCACAACAGATT	1
CTSL		V3LHS_344302	AGAAGAATCCTGTAAGTAC	0.97
CTSL		V2LHS_151073	CCATTTCTGTTGCTATTGA	0.71
CTSL		V3LHS_344301	AGCACAGAATCAGATAACA	0.37
CTSL	TRUE	V2LHS_151070	CATATGAGGCAACAGAAGA	0.28
DAXX		V3LHS_383248	TGGATGATGATGACGAAGA	1.4
DAXX		V3LHS_383251	AGGAGTTGGATCTCTCAGA	0.87
DAXX		V3LHS_383247	AAGCTCTATGTCTACATCA	0.78
DAXX	TRUE	V2LHS_113394	GGCCATTAGGAAACAGCTA	0.74
DNMT3A		V2LHS_202453	CAGCGTCACACAGAAGCAT	0.68
DNMT3A		V3LHS_391162	CGGCTCTTCTTTGAGTTCT	0.67
DNMT3A		V3LHS_391164	CAGATGTTCTTCGCTAATA	0.65
DNMT3A	TRUE	V2LHS_74667	GCATCCACTGTGAATGATA	0.5
DNMT3B		V3LHS_402302	AGGTTAATGCTGAAAAATC	1.1
DNMT3B		V2LHS_11913	CTGTTGTCATGAATGGCAA	1.1
DNMT3B		V2LHS_77234	GACTACTTTGCATGTGAAT	1.1
DNMT3B		V3LHS_402303	AGAAGAGAAAATGTTGTAT	0.87
DNMT3B		V3LHS_318160	CGGCTCTTCTTCGAATTTT	0.83
DOT1L		V3LHS_391521	AAGAAGAAGCTAAACAAGA	1
DOT1L		V2LHS_158941	CACCTCTGAACTTCAGAAT	0.88
DOT1L		V3LHS_391522	CAGATGATTGATGAGATCA	0.84
EHMT1		V2LHS_157629	GATGCCAGCAGTCATGCAA	1.7
EHMT2		V3LHS_364363	AGGATGCTTCTGAAGCTCA	0.73
EHMT2		V2LHS_44409	CGATTGCTCCAGGAATTTA	0.66
EHMT2		V3LHS_364361	AGTCTGAAGTTGAAGCTCT	0.63
EHMT2		V3LHS_364364	TGGTTTGCGCTTCAACTCA	0.56
EP300		V3LHS_331295	AGCTACTGAAGATAGATTA	0.52
EP300		V3LHS_331296	CGGCAAACAGTTGTGCACA	0.47
EP300		V3LHS_331297	TCCAGGACAGTCAAAGAAA	0.3
EZH1		V2LHS_151495	GAAGAGCTCTTCTTTGATT	0.94
EZH1		V2LHS_151492	CCAGTAACAAGAAAGAGAA	0.76
EZH1		V3LHS_324968	CGCAAGAATAAAGAAATCA	0.69
EZH1	TRUE	V3LHS_324967	AGGAAGATTCAGCTGAAGA	0.65
FOXO1		V3LHS_638210	TGGAGGTATGAGTCAGTAT	1.4
FOXO3		V3LHS_375386	CGGAACGTGATGCTTCGCA	1.3
FOXO3		V3LHS_310955	GAGGACGACGATGAAGACG	1.1
FOXO3		V3LHS_641759	TGGACAATAGCAACAAGTA	0.9
FOXO3		V3LHS_641765	CGGCACAACCTGTCACTGC	0.59
HDAC7		V3LHS_351665	AGAGCAAGCGAAGTGCTGT	4.2
HDAC7		V3LHS_413828	GGGACCTGGTTCTCTTCTA	1.6
HDAC7		V3LHS_351666	ACAAGGACAAGAGCAAGCG	1.4
HDAC7		V2LHS_96401	GCTACCATGTTTCTGCCAA	1.3
HDAC7	TRUE	V2LHS_96400	CCAGCAAGATCCTCATTGT	0.9
HMGA2		V3LHS_350283	ACAACAAGTTGTTCAGAAG	1
HMGA2	TRUE	V3LHS_350284	CAACAAGTTGTTCAGAAGA	0.99
KAT2A		V3LHS_332374	CAGCTCTACACAACCCTCA	0.58
KAT2A		V2LHS_243978	CATTCATTCCCTGGCATTA	0.32
KAT2A	TRUE	V2LHS_33997	CAGGTCTATTTCTACCTCT	0.26
KAT2B		V2LHS_53090	GCCCGAATCGCCGTGAAGA	0.37
KAT2B		V3LHS_352683	AGCAAATAATTGTCAGTCT	0.16
KAT2B	TRUE	V3LHS_352686	CGAGGAGTCTTGTAAATGT	0.14
KAT5		V3LHS_340985	AAGTGTTTCCTTGACCATA	1.2
KAT5		V2LHS_253263	GACGTAAGAACAAGAGTTA	0.74
KAT5		V2LHS_198926	GGCTACTTCTCCAAGGAGA	0.66
KDM1A		V3LHS_361045	TGGCTGTGGTCAGCAAACA	1.4
KDM1A		V3LHS_361041	ACGGACAAGCTGTTCCTAA	1.2
KDM1A		V2LHS_34924	CTCCACGAGTCAAACCTTT	0.51
KDM1A		V2LHS_34926	GCCTAGACATTAAACTGAA	0.25
KDM1B		V3LHS_324575	CCCTAAGGACTACCACAAT	0.21
KDM1B		V2LHS_21814	CAGTGCAGTGTATTGATTA	0.16
KDM1B		V2LHS_21813	CTTATAAGCACTTAGATTT	0.14
KDM1B	TRUE	V3LHS_324573	GGGCTTGACATTCAACTCA	0.053
KDM2A		V3LHS_316298	TGGACGTGAACACACAGAA	1.3
KDM2A		V2LHS_245727	CCCTCACTGGAGTTCCTAT	1.2
KDM2A		V2LHS_51037	GAGTCAACCTGGATTATGA	1
KDM2A		V2LHS_51035	CAGAGAACTTTGTGAATGT	0.76
KDM2A	TRUE	V3LHS_316296	AGTGCAGAAGTACTGTCTA	0.76
KDM2B		V2LHS_201903	CTGAACCACTGCAAGTCTA	4
KDM2B		V2LHS_33429	CAACCTGTCTGACTGCAAT	3.5
KDM2B		V2LHS_202733	CACGTCACCGACCAGTCTA	1.1
KDM2B		V3LHS_637194	AGGTCGGATGAGCACTCGA	0.67
KDM2B	TRUE	V3LHS_333082	AGGCCAGGTCAGATGGACA	0.3
KDM3A		V3LHS_394641	AGCTGTTGTTCAAGAAGCA	1.7
KDM3A		V3LHS_394639	ACGATCCTATTCATGATCA	1.1
KDM3A		V2LHS_175580	CCTAATAACTGTTCAGGAA	0.79
KDM3A	TRUE	V3LHS_394638	AGAAGATGGATAGAAGTCT	0.78
KDM4B		V2LHS_161182	GCCCACCTTTGCAGAATAA	1.1
KDM4B		V3LHS_316478	TGCTACGAAGTGAACTTCG	0.79
KDM4B		V2LHS_161184	CCTCTAGGTTCATAATGAA	0.76
KDM4B	TRUE	V3LHS_316481	CAGGTGGTCATCACCAAGA	0.35
KDM4C		V3LHS_337728	AGAAGAAGAGTCATCTGCT	1
KDM4C		V3LHS_337727	CCAGAAGTTCGATTCACTA	0.83
KDM4C		V3LHS_337731	ACCGAAGACATGGACCTCT	0.82
KDM4C	TRUE	V2LHS_207479	CAGAATTTATCAGATCATA	0.75
KDM4D		V3LHS_410834	TGAGTTATTTATGTACTTA	2
KDM4D		V2LHS_155367	GATGGATTGATTATGGCAA	0.46
KDM4D		V2LHS_283415	GTCAGTAGAGTTCCAGAAT	0.44
KDM4D		V3LHS_375849	TGGTCCATCTGCACAGATT	0.4
KDM5A		V3LHS_390196	TGGCAAGCTAAAGAAGTAA	0.68
KDM5A		V2LHS_240312	GACCGCATAGAAGAAGTAA	0.56
KDM5A		V3LHS_390192	TGGACGAGACTCAACACAT	0.52
KDM5A		V3LHS_390194	ACCTAGAAAGAAGAAATTA	0.47
KDM5B		V2LHS_255653	CAGAGGCCATGAATATTAA	0.84
KDM5B		V3LHS_328898	CGACAGTGTGTGGAGCATT	0.77
KDM5B		V2LHS_91501	CGAGGGAAGCGAGATGGAA	0.63
KDM5B		V3LHS_328897	TGGAGCTATTCAATTAACT	0.59
KDM5C		V2LHS_33788	GCCTTTCTGGACCAGATGA	0.63
KDM5C		V2LHS_33784	CATTGTTTATCCCTATGAA	0.5
KDM5C		V2LHS_33786	CCCAGTTTATTGAGTCATA	0.49
KDM5C		V3LHS_349138	AAGACCTTCCTCAAGAAAA	0.46
KDM5C	TRUE	V2LHS_2592	CATTGTTTATCCCTATGAA	0.45
KDM6A		V3LHS_387202	CGGAAGGTGCTATTCAAGT	0.9
KDM6A		V2LHS_66490	GCGCAAATAGAAATAATTT	0.83
KDM6A	TRUE	V2LHS_66564	CTATGAATCTCTAATCTTA	0.79
KDM6B		V3LHS_301324	CCCGACTTGTTCAAGATGA	0.58
KDM6B		V3LHS_301328	CGGTGAAGCGAGCTGCTGA	0.39
KDM6B		V3LHS_301327	ACGGTGCAGCTGTACATGA	0.3
KDM6B	TRUE	V2LHS_139678	GAGACCTCGTGTGGATTAA	0.22
KDM7A		V2LHS_201113	CCCTTGATCTCCAAGTAGT	1.2
KDM7A		V3LHS_362681	AGATAAGTAATGGCAGTCT	1.1
KDM7A		V2LHS_200458	CAGTTGTATCGCTATGATA	0.96
KDM7A		V2LHS_201405	GACTTACCCTTCTCTATTA	0.9
KDM7A	TRUE	V3LHS_362679	AGGAGTAGATCATCAGGAT	0.86
KMT2A		V2LHS_141063	CGAATCAAGCGGAAGAATA	1.3
KMT2A		V3LHS_347826	GGGATCTAGTTCCAGAGAT	1.3
KMT2A		V3LHS_347829	TGCAAGATTGAGAAGAGTA	1.2
KMT2A		V2LHS_198375	GTCTTATTCGCAAACCAAT	1
KMT2A	TRUE	V2LHS_196843	GAGATAAGATCAAGAAGAA	0.99
L3MBTL1		V2LHS_96680	CCTGCACTTTGATGGGTAT	1.5
L3MBTL3		V3LHS_374832	AGGGACGTAGAAGAAGACA	1.9
L3MBTL3		V3LHS_374831	AGCATGCTGATGATGTCAA	1.5
L3MBTL3		V2LHS_100677	CTCCTCATGGATTCCAGAA	1.4
L3MBTL3		V3LHS_374834	CCCTGTAGGCTGGTGTTCA	1.3
L3MBTL3	TRUE	V3LHS_374830	AGCTTGAGGTTGTAGACAA	0.96
MCM6		V2LHS_252067	CGGTTACTGAATAAATCAA	1.5
MCM6		V3LHS_363457	TGAGTCAAGATAAAAATCT	0.42
MCM6	TRUE	V3LHS_409025	CCAGTGAAGTTGGAACCAA	0.15
MECOM		V3LHS_319139	AGATGCTTACTTCACAGAA	1.6
MECOM		V3LHS_347752	AGGAAGATCGAAGTAGGTG	1.4
MECOM		V3LHS_319140	TGGAGATGAGTTGCAAGAC	0.76
MECOM	TRUE	V3LHS_347753	TGGACCAAAAGGAAGATCG	0.71
MECP2		V2LHS_61221	CAGTTGGATTCTTTAGAGA	0.85
MECP2		V3LHS_378907	AGGCTGGACACGGAAGCTT	0.43
MECP2	TRUE	V3LHS_378909	GGAAGCTTAAGCAAAGGAA	0.34
MTA1		V3LHS_395804	TGAAGCTGAGAGCAAGTTA	1
MTA1	TRUE	V2LHS_41053	GGGAGGATTTCTTCTTCTA	0.053
NAT10		V3LHS_363494	TCAGTGACGACCTAGATGA	0.87
NAT10		V3LHS_363498	AGACCCTCAGTGACGACCT	0.61
NAT10		V3LHS_363495	CGGACCATGAACTCACTCA	0.54
NAT10		V2LHS_157116	CTGGATTTGTTCCTGTTTA	0.46
NAT10	TRUE	V2LHS_157118	CGCAAAGTTGTGAAGCTAT	0.36
NCOA1		V3LHS_302538	AGGCAGATGAGCTCACAGA	4.1
NCOA1		V3LHS_302536	ACGAATGTTCAGAACATGA	0.85
NCOA1		V3LHS_302537	AGCAGCTACTGACTGAATA	0.51
NCOA1	TRUE	V3LHS_359997	AGATAGTAGAATCACAGAT	0.39
NCOA3		V2LHS_206740	GACAGGCACTTGAATTGAA	0.41
NCOA3		V2LHS_207128	CAATGATGATGATGTTCAA	0.36
NCOA3		V2LHS_206781	CTGGTTAACACAAGTGTTT	0.28
NCOA3	TRUE	V2LHS_261936	CAGTCTATTCGTCCTCCAT	0.15
NCOR2		V3LHS_369705	AGCAAGCTGACCGAGAGCA	1.7
NCOR2		V2LHS_196739	GGAATGAGCCTGAATACAA	1.2
NCOR2		V3LHS_369703	AAGACTGTGTCGCAGTGTA	0.59
NCOR2		V3LHS_369704	AGCCTGGTGCAGATCATCT	0.53
NFYA		V2LHS_92014	GTCATTCCTTTAGCATCAT	1.2
NFYA		V2LHS_92015	CTTTGCCTATTATCTGCTA	1
NFYA	TRUE	V2LHS_271075	CATGTTAATGGATAAAGGA	0.95
PADI4		V3LHS_334665	CCGCAGCTCTTCAAGCTCA	0.95
PADI4		V2LHS_48867	CAGTCAAAGCTCTACTCTA	0.52
PADI4		V3LHS_334663	CCAGTCAAAGCTCTACTCT	0.47
PBRM1		V2LHS_221869	CGGAGTCTTTGATCTACAA	0.7
PBRM1		V2LHS_174968	CTGATTATTACCAGCAAAT	0.65
PBRM1		V3LHS_318948	GGCGACTGTGTCTTCATCA	0.6
PBRM1		V2LHS_174969	CATCTACAAGCGAGTTCTA	0.52
PBRM1		V3LHS_318943	AGGAAGAATGTTGAAAATA	0.5
PBRM1	TRUE	V3LHS_318947	AGGATGCAAATTCAATTAA	0.35
PHF8		V2LHS_47391	GAGAGATTGGGAAAGGAGA	0.6
PHF8		V3LHS_344183	AGCTTGGTGATTTTGTGAA	0.5
PHF8		V3LHS_406170	AGGTCATCGTTCAAGCAGA	0.44
PHF8		V2LHS_47393	CAGCTCAAAGCCTATGAGA	0.42
PHF8	TRUE	V3LHS_344179	ACTATGTTGGTTCTGACAA	0.34
PPARGC1A		V2LHS_71177	GTGTGATTTATGTCGGTAA	0.26
PPARGC1A		V2LHS_71173	CCAACACTCAGCTAAGTTA	0.16
PRDM5		V3LHS_389101	CGACACAAGATGACTCATA	1
PRDM5		V3LHS_389102	GGGAAGAAATTCCCAGTTA	0.85
PRDM5		V3LHS_389100	TCAATGTGAATCGAGTTTT	0.7
PRDM5	TRUE	V3LHS_389104	TGAAAGACACAAGAAGTAT	0.35
PRKDC		V3LHS_372860	AGACAGAATGTCGACACAA	0.063
PRKDC	TRUE	V2LHS_94774	CAGTGAAAGTCTGAATCAT	0.057
PRMT1		V3LHS_381701	TCGTCAAAGCCAACAAGTT	0.74
PRMT1		V3LHS_381699	CCGTTCTGCCTGCAAGTGA	0.6
PRMT1		V3LHS_381697	TGGAAGCAGACGGTGTTCT	0.57
PRMT1		V2LHS_274884	CGCAACTCCATGTTTCATA	0.46
PRMT1		V3LHS_381700	CGCAACTCCATGTTTCATA	0.46
PRMT1		V2LHS_234934	GACATGACATCCAAAGATT	0.29
PRMT3		V3LHS_362408	CCGAGATTTCATATACCAA	0.32
PRMT3		V2LHS_12378	CTTGTGGTATTAAGCATAT	0.31
PRMT3		V3LHS_408882	AGATTTATGTGCAAAGGTT	0.31
PRMT3	TRUE	V3LHS_362406	AGGACAAAATACGAACAGA	0.29
PRMT6		V2LHS_155920	CTATGGTACTTCTTCCTCA	0.77
PRMT6		V2LHS_155923	GACAATTCAAACTATGCTT	0.58
PRMT6		V3LHS_408221	AGAGAGAGACCTGAAAGAA	0.41
PRMT6		V3LHS_408220	AGTGTGAATCTTGTTATCA	0.37
PRMT7		V3LHS_320275	GGCTTTAGTGATAAGATTA	1
PRMT7		V3LHS_320274	AGCTATGCAGTGGAGTTTC	0.99
PRMT7		V3LHS_320273	TGGCTTTAGTGATAAGATT	0.94
PRMT7		V3LHS_320272	ACAGAGTTGTTTGACACAG	0.94
PRMT7	TRUE	V2LHS_220218	CTAACCACTTGGAAGATAA	0.89
SATB1		V2LHS_31609	CTCTTATTGTTGTATGCAA	0.93
SATB1		V2LHS_31614	GCATTGCTGTCTCTAGGTT	0.62
SETD1A		V3LHS_316056	CGCATCGAGATGCTGCTGA	0.83
SETD1A		V2LHS_119184	CTGCCTTCATTCAAGGTAA	0.59
SETD1A	TRUE	V3LHS_316055	AGCTTGACATCAAAGGACA	0.48
SETD7		V2LHS_230143	CACTTTATGGGAAATTTAT	0.38
SETD7	TRUE	V2LHS_99174	CGCACTTTATGGGAAATTT	0.13
SETD8		V3LHS_305423	AGGAGCTCCAGGAAGAGCA	0.68
SETD8	TRUE	V3LHS_305421	CGCCTAGGAAGACTGATCA	0.36
SIN3A		V3LHS_343548	AGATGGTGTATGTGATCAA	0.33
SIN3A		V2LHS_96674	GAAATTCCCTGAGTTGTTT	0.27
SIN3A		V3LHS_343545	AAGATGGTGTATGTGATCA	0.21
SIRT1		V2LHS_20111	CAGCTAAGAGTAATGATGA	1.3
SIRT1		V3LHS_389163	AAGTTGACTGTGAAGCTGT	1.2
SIRT1		V3LHS_389161	AGACTCAAGTTCACCAGAA	1
SIRT1		V2LHS_20109	CGATGTTTGATATTGAATA	0.88
SIRT2		V3LHS_367319	TGGACGAGCTGACCTTGGA	0.71
SIRT2		V3LHS_367315	AGCGCGTTTCTTCTCCTGT	0.46
SIRT2	TRUE	V2LHS_240481	GACTTCCTGCGGAACTTAT	0.24
SIRT3		V3LHS_365648	AGCTTGATGGACCAGACAA	1
SIRT3	TRUE	V3LHS_365650	AAGCCCAACGTCACTCACT	0.33
SMARCA2		V3LHS_372090	AGGATGACGCTGAAGTAGA	0.57
SMARCA2		V3LHS_372091	AGATGGTTCTGAGAAAGAT	0.56
SMARCA2		V3LHS_372095	AGCTTCGAGCTCAGATTTT	0.39
SMARCA4		V3LHS_317180	AGCGACTCACTGACGGAGA	0.38
SMARCA4		V2LHS_153152	CAGAAGAAATCATCACGGA	0.37
SMARCA4		V2LHS_7924	CAGAAGAAATCATCACGGA	0.37
SMARCA4		V3LHS_317182	AGCCTCAACGACCTAGAGA	0.36
SMARCA4	TRUE	V2LHS_153153	CCGTGGACTTCAAGAAGAT	0.3
SMYD3		V3LHS_306474	AACTGTTCGATTGTGTTCA	1.1
SMYD3		V3LHS_306475	AGGAAGTTGGTGTTGGCCT	1
SMYD3		V3LHS_400615	TCCGTGTTTGTGTAGGTAA	1
SMYD3	TRUE	V3LHS_400614	ACGATTATAATAAATTCAA	0.97
SUV39H1		V3LHS_327224	CGCATCACTGTAGAGAATG	1
SUV39H1		V2LHS_29962	GGGCCTTCGTGTACATCAA	0.97
SUV39H1		V2LHS_153686	GAGCTCACCTTTGATTACA	0.91
SUV39H1		V3LHS_327225	AAGTGTGTGCGTATCCTCA	0.9
SUV39H1		V3LHS_403672	ACCTGCTCCTACCTGCTCT	0.87
SUV39H1	TRUE	V3LHS_327226	AGCAGTTCCACAAGGACTT	0.83
TAF1		V3LHS_320582	AGGAGCGTCCTGACCTAAA	0.93
TAF1		V3LHS_635942	TGGACCTGAGAGTCAGTAT	0.84
TAF1		V2LHS_42670	GTGATCTTATTCTTGCAGA	0.83
TAF1	TRUE	V3LHS_635945	AGGATGGACATGGAAAATG	0.54
TAF1L		V3LHS_636908	AGAAGTTTGTTCCAGATTA	1.3
TAF1L		V3LHS_636901	AAGAAGTTTGTTCCAGATT	0.65
TBL1X		V2LHS_56287	AGCTTTGTGTGATTCATGT	1.1
TBL1X		V2LHS_56288	CCTGTGGAATGTTATTGTT	1
TBL1X		V3LHS_412426	GCAAGCAATTCACTAGACA	1
TBL1X		V3LHS_412427	ACCTTGTGTGTTGTAGCTC	1
TBL1X	TRUE	V3LHS_412428	AGGAGAAAGATCTTTTTTA	0.96
TNKS		V3LHS_392714	TGAGTGAGAGTACACCTAT	1.4
TNKS	TRUE	V3LHS_392713	TGCATGAAGCTGCTATTAA	0.51
TRDMT1		V2LHS_239169	GTTATCGCCTACTTGGAAA	1.5
TRDMT1	TRUE	V2LHS_242346	CCCTTAATTCATAATTGAA	0.33
TRIM24		V3LHS_644998	AGGTTAGATGCTATTAAGA	0.81
TRIM24		V3LHS_328268	TGTCAGTTGTTAGAACATA	0.78
TRIM24		V2LHS_255059	GCTGGACTCTCTAAACAAT	0.77
TRIM24		V3LHS_636655	AGGAATGAATCAGAAGATA	0.6
TRIM24		V2LHS_16660	CTTGTTAAGTTAACACCTA	0.57
TRIM24	TRUE	V2LHS_254928	GAATGAATCAGAAGATAAT	0.53
TRIM28		V3LHS_640069	AGGAGATGATCCCTACTCA	0.44
TRIM28		V3LHS_640072	CCCATGTGTCAGGTGTGAA	0.42
TRIM28	TRUE	V3LHS_640068	CGCATGTTCAAGCAATTCA	0.41
TRIM33		V3LHS_305447	TAGTTGTGAAGACAATGCA	0.9
TRIM33		V2LHS_134256	CTCAGTTACCAATCCAGAA	0.65
TRIM33	TRUE	V2LHS_134259	CATTGTACTTTGAAGATAA	0.44
UBE2I		V3LHS_376934	ACAGAGTGGAGTACGAGAA	1
UBE2I		V3LHS_376935	AGGAATACAGGAACTTCTA	0.96
UBE2I		V2LHS_171776	CCTACACGATTTACTGCCA	0.95
UBE2I		V2LHS_171781	CCACTTCCTTTGTGTTTAT	0.88
UBE2I		V2LHS_254973	GAATACAGGAACTTCTAAA	0.41
UBE2I	TRUE	V3LHS_376933	CGGATGCTTTTCAAAGATG	0.35
WDR5		V3LHS_330806	AGATTGTACAGAAACTACA	0.71
WDR5	TRUE	V2LHS_140181	CTCAACAGCTTGTCACCCA	0.21
YY1		V2LHS_219592	CTCCTGATTATTCAGAATA	0.52
YY1	TRUE	V2LHS_172065	CCTCTCCTTTGTATATTAT	0.49

## Sheet: Supplementary File 1b
Supplementary File 1b. Results of in vivo and in vitro screen.
l2fc, Log2 fold change
	In Vivo Screen Results			In Vitro Screen Results
symbol	in_vivo_pvalue	in_vivo_L2FC	significant_in_vivo	in_vitro_passage2_L2fC	in_vitro_passage6_L2fC	in_vitro_passage10_L2fC
KDM6A	2.3e-08	1.01479	1	-0.129417	-0.366021	0.322076
PRDM5	0.000680282	0.984135	1	0.511734	0.190083	0.487645
SIRT2	0.00111376	0.971252	1	0.236425	0.0151392	0.513331
CBX7	0.0131437	0.964771	1	0.114094	-0.378728	-0.140743
BRD9	0.00490743	0.904284	1	0.173625	0.0678265	0.669011
L3MBTL3	2.32e-05	0.816855	1	0.210516	0.16707	-0.523449
SETD1A	0.00213511	0.801231	1	0.207136	-0.193631	0.00729053
KMT2A	0.00189196	-0.907217	1	0.0410455	-0.379269	-0.790308
CSNK2A1	0.00105006	-1.07672	1	0.134816	-0.165969	-0.160974
YY1	0.0167121	-2.09504	1	0.714993	-0.0881468	0.04095
UBE2I	0.0266799	-2.24846	1	0.0102365	-0.255826	-3.11035
NAT10	8.1e-08	-2.49394	1	0.221349	-1.75704	-4.05293
WDR5	0.000165469	-2.71996	1	-0.786921	-0.992974	-2.75582
MCM6	3.7e-05	-5.65157	1	-0.0983534	-0.485453	-2.48111
TRIM33	5.59e-05	0.686662	0	-0.113346	-0.874942	0.602981
SMYD3	0.0206951	0.676403	0	-0.0094699	-0.0344729	0.59579
TRIM24	0.338402	0.553246	0	0.619827	0.00305448	0.270826
NFYA	0.0143564	0.535041	0	-0.15974	-0.100744	0.458079
MECOM	0.0038535	0.533456	0	0.258543	0.0216281	0.243998
KDM2A	0.00616653	0.501181	0	0.265652	0.286245	1.08388
SUV39H1	0.156577	0.449789	0	0.0259374	-0.088368	0.419052
BAZ2B	0.0783606	0.370342	0	0.335384	0.356599	0.960702
KDM6B	0.00858086	0.365524	0	-0.0571031	0.114418	0.722436
BRPF1	0.0128361	0.357008	0	0.599504	0.0190806	-0.171343
KDM3A	0.142703	0.346918	0	0.301883	0.16887	0.353643
CBX8	0.0309562	0.340091	0	-0.0407325	-0.160085	0.134976
KAT2B	0.0182429	0.328062	0	-0.0838654	0.065861	0.06462
MECP2	0.100694	0.302159	0	0.214119	0.338082	0.0900501
SIRT3	0.206817	0.296526	0	0.583367	-0.551511	-0.320563
HMGA2	0.0243758	0.262627	0	0.255184	-0.0195661	0.279302
TBL1X	0.179666	0.245226	0	0.192771	0.17542	-0.247551
CARM1	0.452461	0.21436	0	0.424175	0.00151098	-0.94773
PRMT7	0.256806	0.173529	0	0.402998	-0.150156	0.28992
DNMT3A	0.940531	0.169356	0	-0.160163	0.392859	-1.19888
TRDMT1	0.120617	0.127644	0	0.739173	0.0860346	0.0113866
TAF1	0.622609	0.124495	0	0.00493344	-0.175213	0.00674486
SMARCA4	0.0126894	0.122238	0	-0.481149	0.507313	-0.351906
BAZ2A	0.757007	0.0475367	0	-0.473055	0.760876	-0.777176
KMT5A	0.558335	0.0325337	0	-0.421321	0.56758	-0.711257
SETD7	0.770552	0.0320304	0	0.0933579	-0.253303	-0.645801
CREBBP	0.586115	0.00612207	0	-0.434761	0.0559566	-1.70693
KDM1B	0.939098	-0.00639149	0	0.054907	0.0615177	-0.0629852
NCOA1	0.890619	-0.021758	0	-0.216877	0.126683	0.0324874
HDAC7	0.935202	-0.0561699	0	0.242858	-0.11639	0.20307
KDM5C	0.79563	-0.0746254	0	0.0178777	0.0195549	0.624697
TRIM28	0.734787	-0.103411	0	0.207601	0.0131946	0.278469
TNKS	0.787686	-0.136895	0	-0.0751035	0.130746	0.711802
KDM7A	0.00278406	-0.14454	0	0.179104	0.412108	0.0756071
KAT2A	0.24839	-0.147072	0	0.162081	-0.104842	0.242822
NCOA3	0.748829	-0.158	0	0.135821	0.182007	-0.209407
KDM2B	0.778047	-0.159591	0	0.111123	0.143319	-0.0118737
KDM4B	0.875794	-0.164121	0	1.01404	-0.201305	0.00814932
BRD2	0.0721058	-0.194024	0	-0.0921811	0.0540132	0.149042
PRMT3	0.100924	-0.233076	0	-0.14338	-0.548255	-0.58519
BRPF3	0.138969	-0.24707	0	-0.0656346	0.220861	-0.226214
PBRM1	0.00168269	-0.266007	0	-0.122162	0.199276	-0.128304
BRD3	0.310352	-0.280259	0	0.0117021	0.269084	-0.12859
CTSL	0.43746	-0.329752	0	0.221595	0.0280184	0.0709689
KDM4C	0.0526127	-0.437608	0	-0.12372	-0.274232	0.195006
PRKDC	0.31592	-0.437883	0	0.470958	0.0809261	0.0679743
MTA1	0.315218	-0.5568	0	0.06111	0.0247764	0.388385
EZH1	0.0347888	-0.560572	0	-0.228858	-0.128688	-0.155103
DAXX	0.115601	-0.57633	0	0.1742	0.0426001	0.493544
PHF8	0.00291459	-0.776178	0	-0.111111	-0.203405	-0.724705

## Sheet: Supplementary File 1c
Supplementary File 1c. Shared differentially expressed genes (DEGs) after WDR5 knockdown in LM2, BrM3, and BoM.
l2fc, Log2 fold change; padj, adjusted p value.
Ensembl ID	HGNC symbol	LM2.l2fc	LM2.padj	BrM3.l2fc	BrM3.padj	BoM.l2fc	BoM.padj
ENSG00000187837	HIST1H1C	1.24921	1.06e-18	1.24575	8.96e-15	1.19412	1.94e-07
ENSG00000124635	HIST1H2BJ	1.66553	6.51e-18	1.29905	1.6e-16	1.73861	7.85e-21
ENSG00000276180	HIST1H4I	1.4296	2.22e-14	0.970578	7.8e-13	1.44411	1.42e-12
ENSG00000158373	HIST1H2BD	1.48212	3.57e-11	0.941934	3.96e-09	1.18857	1.2e-10
ENSG00000166750	SLFN5	0.951971	1.01e-09	0.733771	1.56e-07	1.02581	0.000353691
ENSG00000180573	HIST1H2AC	1.08618	1.27e-09	0.963515	4.54e-24	1.22236	9.27e-14
ENSG00000285906		0.873068	1.51e-07	0.65791	2.83e-06	0.832339	7.58e-05
ENSG00000175197	DDIT3	0.868874	1.51e-07	0.566353	0.000842516	0.652491	0.0117326
ENSG00000227234	SPANXB1	0.893075	5.09e-07	0.401737	0.000811107	0.728784	0.00959719
ENSG00000197903	HIST1H2BK	1.4818	9.16e-07	1.3008	1.97e-13	1.23466	6.21e-07
ENSG00000158406	HIST1H4H	1.18716	9.87e-07	0.896385	1.35e-09	1.41422	3.49e-14
ENSG00000064692	SNCAIP	0.843688	7.9e-06	0.772783	5.09e-07	1.20435	4.34e-07
ENSG00000145287	PLAC8	0.71843	1.53e-05	0.627772	8.06e-10	0.699562	0.00116022
ENSG00000180596	HIST1H2BC	1.21475	3.1e-05	0.917927	8.71e-06	1.46714	1.22e-07
ENSG00000184678	HIST2H2BE	1.09616	3.1e-05	0.67212	0.00268168	1.40722	2.71e-08
ENSG00000124657	OR2B6	1.57632	6.26e-05	0.939346	0.029704	2.03396	2.19e-08
ENSG00000189056	RELN	1.19288	8.29e-05	0.781071	0.0137046	1.22645	3.75e-06
ENSG00000089157	RPLP0	0.533311	0.000116995	0.675454	1.57e-06	0.561315	0.00492211
ENSG00000137955	RABGGTB	0.624024	0.000153999	0.745254	3.13e-05	0.97709	5.38e-06
ENSG00000087086	FTL	0.66877	0.000186898	0.591133	0.00364975	0.503478	0.0105838
ENSG00000265972	TXNIP	0.74124	0.00019038	0.637089	3.33e-17	0.751138	2.08e-05
ENSG00000087074	PPP1R15A	0.684001	0.000208553	0.770344	3.24e-06	0.591883	0.000185682
ENSG00000125266	EFNB2	0.605516	0.000267058	0.388661	0.00352329	0.655835	0.000415318
ENSG00000164305	CASP3	0.554626	0.000301612	0.844557	1.05e-08	0.458089	0.00419685
ENSG00000132475	H3F3B	0.570477	0.0004502	0.520627	4.4e-07	0.553056	0.00487864
ENSG00000257219	LNCOG	0.94241	0.0004502	0.638598	4.99e-05	0.829724	6.14e-05
ENSG00000233822	HIST1H2BN	0.985759	0.0004502	0.852355	0.00921963	0.989934	0.00797129
ENSG00000138759	FRAS1	0.610089	0.000553035	0.494053	2.51e-05	0.795156	0.000516266
ENSG00000116761	CTH	0.534242	0.000874046	0.509	1.66e-05	0.51625	0.0115012
ENSG00000128512	DOCK4	0.54498	0.00093548	0.469259	1.1e-05	0.610889	0.0317257
ENSG00000283196		0.642764	0.00112962	0.448514	0.00546763	0.600153	0.0374217
ENSG00000070756	PABPC1	0.422582	0.0011975	0.487074	9.93e-07	0.505083	0.00563414
ENSG00000229563	LINC01204	1.15254	0.0013343	1.10313	0.00974724	0.825992	0.00993994
ENSG00000178035	IMPDH2	0.543622	0.00144733	0.745767	6.5e-12	0.608417	0.000200209
ENSG00000196569	LAMA2	1.00502	0.00165493	1.05326	0.000166993	0.70963	0.0209846
ENSG00000171346	KRT15	0.896116	0.00183837	0.670744	0.00425518	0.705371	0.0227246
ENSG00000242779	ZNF702P	0.762961	0.00192909	0.585462	0.00424023	0.676664	0.00501393
ENSG00000088387	DOCK9	0.462352	0.00219222	0.220295	0.0402494	0.468901	0.0360093
ENSG00000133639	BTG1	0.496385	0.00234357	0.584915	2.17e-07	0.622765	0.00469914
ENSG00000047056	WDR37	0.471069	0.00239105	0.449719	0.00597411	0.396398	0.0376555
ENSG00000188846	RPL14	0.447104	0.00244771	0.544398	2.77e-08	0.563083	0.00492721
ENSG00000006652	IFRD1	0.481173	0.00275891	0.434694	0.00138072	0.544413	0.00233067
ENSG00000221983	UBA52	0.440119	0.00283265	0.478555	0.00527536	0.611479	0.0157296
ENSG00000161981	SNRNP25	0.534606	0.00314962	0.407603	0.00962897	0.46659	0.0404225
ENSG00000165775	FUNDC2	0.45836	0.00321122	0.512448	2.81e-05	0.509615	0.0102178
ENSG00000173812	EIF1	0.511912	0.00342618	0.469172	2.34e-05	0.580048	0.00903282
ENSG00000101384	JAG1	0.610837	0.00351342	0.740464	3.3e-19	0.605828	0.00707226
ENSG00000122026	RPL21	0.467556	0.00354519	0.587609	2.17e-09	0.625225	0.00866942
ENSG00000120656	TAF12	0.703181	0.00448848	0.571558	0.0309894	0.944192	0.000176114
ENSG00000163683	SMIM14	0.594316	0.00479263	0.475182	0.00916242	0.701181	0.000932932
ENSG00000196262	PPIA	0.426211	0.00521395	0.561472	5.18e-08	0.459923	0.0474551
ENSG00000175061	SNHG29	0.414046	0.00667881	0.511921	3.29e-06	0.460362	0.0140937
ENSG00000210082	MT-RNR2	0.447588	0.006697	0.601301	9.98e-08	0.6793	1.44e-05
ENSG00000148672	GLUD1	0.434167	0.0070573	0.352584	0.000502891	0.379983	0.0235123
ENSG00000106780	MEGF9	0.507092	0.00750905	0.51609	0.000346408	0.529477	0.00339055
ENSG00000145741	BTF3	0.475615	0.00792615	0.413821	2.2e-06	0.472198	0.0221791
ENSG00000143198	MGST3	0.475358	0.00792615	0.425241	0.000472075	0.571987	0.0358705
ENSG00000143549	TPM3	0.435036	0.00804764	0.481571	3.64e-06	0.389512	0.0161885
ENSG00000111640	GAPDH	0.431635	0.00814262	0.495422	0.00359687	0.391627	0.0496544
ENSG00000145147	SLIT2	0.41384	0.00826403	1.00705	4.54e-24	0.984266	0.000244413
ENSG00000171444	MCC	0.46459	0.00844977	0.585863	8.86e-06	0.618772	0.0282788
ENSG00000076604	TRAF4	0.525595	0.0092104	0.471216	0.0038185	0.473886	0.023299
ENSG00000272468		1.50334	0.00969994	1.2024	0.00527536	1.6824	0.000165104
ENSG00000249992	TMEM158	0.781061	0.00979797	0.417267	0.00448977	0.446392	0.0216472
ENSG00000116106	EPHA4	0.600381	0.0104868	0.630707	3.06e-07	0.986732	0.000318282
ENSG00000113013	HSPA9	0.390402	0.010784	0.375809	0.000563427	0.448542	0.00804567
ENSG00000196655	TRAPPC4	0.452623	0.0108735	0.387982	0.00386065	0.548162	0.0189302
ENSG00000117450	PRDX1	0.465156	0.0117063	0.456896	3.48e-06	0.486171	0.0144243
ENSG00000196954	CASP4	0.508217	0.0117841	0.451297	0.00010286	0.551774	0.000938215
ENSG00000175471	MCTP1	0.468501	0.0117841	0.430351	0.0453176	0.569811	0.00268638
ENSG00000125430	HS3ST3B1	0.638197	0.0129453	0.50505	0.00338011	0.647184	0.00884452
ENSG00000204767	INSYN2B	0.535281	0.0134863	0.670284	5.37e-08	0.881049	1.02e-05
ENSG00000185305	ARL15	0.563404	0.0142239	0.5191	0.00460989	0.583596	0.00485887
ENSG00000134259	NGF	1.06273	0.0147858	0.422285	0.034045	0.711903	0.0244308
ENSG00000173598	NUDT4	0.413642	0.0154585	0.519637	0.000663162	0.583763	0.000176114
ENSG00000143507	DUSP10	0.511136	0.0155956	0.653395	2.68e-05	0.796621	1.16e-05
ENSG00000135046	ANXA1	0.403911	0.0155956	0.356585	0.0186446	0.541466	0.0100155
ENSG00000197451	HNRNPAB	0.386751	0.0157723	0.543801	9.58e-08	0.472844	0.0115761
ENSG00000090621	PABPC4	0.366873	0.0157723	0.431186	7.38e-05	0.413121	0.0107876
ENSG00000110700	RPS13	0.406173	0.0162256	0.438788	3.16e-07	0.587257	0.029676
ENSG00000095739	BAMBI	0.505278	0.0176106	0.493438	0.00164614	0.610445	0.0247438
ENSG00000120217	CD274	0.626538	0.0178145	0.679339	0.000938257	0.66128	0.000725266
ENSG00000168028	RPSA	0.481685	0.0183375	0.547113	1.31e-06	0.520195	0.0235123
ENSG00000074527	NTN4	0.54277	0.0185462	0.518782	3.7e-05	0.721665	5.17e-06
ENSG00000096384	HSP90AB1	0.427564	0.0186307	0.552835	3.01e-06	0.486191	0.00469914
ENSG00000108561	C1QBP	0.375318	0.0203342	0.642688	1.6e-12	0.498202	0.00612689
ENSG00000145632	PLK2	0.399461	0.0215959	0.405419	5.23e-06	0.432747	0.015633
ENSG00000169016	E2F6	0.440226	0.0216464	0.351905	0.00408302	0.42962	0.0224903
ENSG00000255717	SNHG1	0.423266	0.0218032	0.565201	1.35e-07	0.834923	0.000480125
ENSG00000163938	GNL3	0.385586	0.0222528	0.447717	0.000969572	0.595881	0.00242548
ENSG00000213551	DNAJC9	0.455428	0.0230243	0.430569	0.00652186	0.486908	0.0109301
ENSG00000177954	RPS27	0.468499	0.0230412	0.53893	0.00199377	0.589552	0.0420672
ENSG00000159433	STARD9	0.471787	0.0234523	0.451256	0.000399707	0.634752	0.0185421
ENSG00000115758	ODC1	0.462219	0.0278262	0.48893	5.86e-05	0.47764	0.00959719
ENSG00000182568	SATB1	0.394397	0.0282952	0.58069	7.16e-06	0.819081	3.59e-05
ENSG00000170791	CHCHD7	0.412225	0.0282952	0.351052	0.00375897	0.582223	0.0175396
ENSG00000100554	ATP6V1D	0.449438	0.029959	0.545837	0.000305588	0.484029	0.00563414
ENSG00000110321	EIF4G2	0.399425	0.0301222	0.393777	0.000346408	0.472699	0.00650825
ENSG00000214078	CPNE1	0.416681	0.0308165	0.508063	0.00922095	0.501466	0.00767785
ENSG00000067066	SP100	0.39656	0.0310216	0.520414	0.000477016	0.678686	2.72e-06
ENSG00000147872	PLIN2	0.356187	0.0327738	0.420851	7.4e-05	0.413393	0.0235909
ENSG00000064651	SLC12A2	0.540405	0.0334209	0.542513	2.36e-05	0.678933	0.00752237
ENSG00000008311	AASS	0.404898	0.0338549	0.406838	0.0220971	0.376512	0.0356259
ENSG00000104131	EIF3J	0.404593	0.0344514	0.440196	0.00398761	0.461276	0.0115012
ENSG00000184226	PCDH9	0.584984	0.0359735	0.554143	0.00222241	1.05708	0.000138774
ENSG00000237441	RGL2	0.420156	0.0363849	0.44532	0.0015056	0.37009	0.0298727
ENSG00000163950	SLBP	0.405867	0.0364022	0.369417	0.00148565	0.456504	0.038716
ENSG00000002549	LAP3	0.358774	0.0369584	0.51271	4.98e-06	0.526427	0.00182557
ENSG00000234155	LINC02535	0.629724	0.0372576	0.701431	0.000526604	1.03083	7.1e-06
ENSG00000131773	KHDRBS3	0.358045	0.0373166	0.482987	2.59e-05	0.395965	0.0427748
ENSG00000023608	SNAPC1	0.413647	0.0401468	0.459113	0.00438936	0.426635	0.0222677
ENSG00000151458	ANKRD50	0.445222	0.0401468	0.363133	0.0296079	0.625286	0.0235909
ENSG00000174444	RPL4	0.330582	0.0402061	0.466496	0.00265785	0.362818	0.0433474
ENSG00000176697	BDNF	0.409858	0.0418251	0.53455	4.67e-05	0.584293	0.000656314
ENSG00000100911	PSME2	0.404103	0.0421069	0.443397	0.0003714	0.541806	0.0127589
ENSG00000173145	NOC3L	0.469169	0.0428662	0.600991	0.0237419	0.697991	7.62e-06
ENSG00000100941	PNN	0.434266	0.0480707	0.399628	0.0295734	0.486813	0.0216848
ENSG00000118181	RPS25	0.340454	0.0490935	0.423652	4.03e-05	0.536964	0.034407
ENSG00000196363	WDR5	-2.37947	1.48e-58	-1.90312	8.55e-64	-2.19563	3.47e-33
ENSG00000100504	PYGL	-1.58488	7.25e-32	-1.32381	5.09e-57	-1.96776	6.47e-45
ENSG00000107745	MICU1	-0.984751	6.84e-15	-0.728462	5.73e-12	-1.09854	4.69e-14
ENSG00000071082	RPL31	-0.859303	3.11e-12	-0.686173	1.56e-11	-0.663747	0.00693876
ENSG00000184867	ARMCX2	-1.06314	4.87e-12	-0.265582	0.0107619	-0.660897	3.41e-05
ENSG00000174080	CTSF	-1.16788	4.98e-12	-1.22925	8.46e-24	-1.82231	7.85e-21
ENSG00000135624	CCT7	-0.869065	1.02e-11	-0.669024	6.21e-09	-0.873263	4.34e-07
ENSG00000103202	NME4	-1.62423	2.47e-11	-1.15633	1.27e-07	-1.82568	1.8e-14
ENSG00000089009		-0.976089	5.36e-11	-0.517518	2.41e-06	-0.7624	0.000100234
ENSG00000109475	RPL34	-0.945592	1.68e-10	-0.745054	3.64e-15	-0.936536	2.13e-05
ENSG00000147604	RPL7	-0.884672	1.68e-10	-0.710698	2.3e-11	-0.637442	0.00215504
ENSG00000232956	SNHG15	-0.898167	2.52e-10	-0.833001	1.39e-08	-0.854546	0.000335098
ENSG00000128596	CCDC136	-1.33108	3.87e-10	-1.55052	1.71e-07	-1.8813	1.72e-08
ENSG00000144713	RPL32	-0.752206	4.09e-10	-0.523556	0.000812283	-0.624727	0.00704614
ENSG00000164587	RPS14	-0.759557	8.84e-10	-0.597869	3.03e-06	-0.538848	0.0245814
ENSG00000149582	TMEM25	-1.05762	1.01e-09	-1.26529	2.04e-20	-1.43063	1.2e-13
ENSG00000108852	MPP2	-1.69288	1.23e-09	-1.54011	8.05e-14	-2.07143	1.74e-15
ENSG00000197756	RPL37A	-0.943612	2.33e-09	-0.781452	5.38e-07	-0.850222	0.000775102
ENSG00000163682	RPL9	-0.893988	3.79e-09	-0.561284	7.37e-12	-0.528817	0.0330731
ENSG00000106400	ZNHIT1	-1.19962	7.4e-09	-0.686124	0.000891021	-1.19708	2.76e-06
ENSG00000231500	RPS18	-0.86285	1.04e-08	-0.434983	0.000446118	-0.647882	0.00103101
ENSG00000138326	RPS24	-0.918863	1.15e-08	-0.73555	3.3e-09	-0.886094	5.31e-06
ENSG00000145592	RPL37	-0.839278	3.17e-08	-0.67493	8.52e-08	-0.611776	0.0189524
ENSG00000122406	RPL5	-0.73798	3.28e-08	-0.517719	1.9e-09	-0.598298	0.00308367
ENSG00000075151	EIF4G3	-0.671704	4.23e-08	-0.658101	2.98e-09	-0.473647	0.00885305
ENSG00000088367	EPB41L1	-0.858982	4.47e-08	-0.789987	1.06e-07	-1.25618	4.88e-12
ENSG00000105290	APLP1	-1.62361	8.96e-08	-1.72095	7.66e-10	-2.251	1.51e-14
ENSG00000187147	RNF220	-0.796493	1.06e-07	-0.586551	8.64e-06	-0.570302	0.00260201
ENSG00000143126	CELSR2	-1.26445	1.12e-07	-1.73258	3.11e-17	-1.94955	1.2e-18
ENSG00000197557	TTC30A	-1.22593	1.14e-07	-1.44913	4.03e-06	-1.5939	0.00180755
ENSG00000198934	MAGEE1	-1.61221	1.41e-07	-1.00599	2.13e-10	-1.57921	2.15e-05
ENSG00000101017	CD40	-0.992374	1.83e-07	-1.27983	2.04e-20	-0.984684	4.83e-08
ENSG00000003137	CYP26B1	-1.07834	3.56e-07	-0.832149	9.65e-10	-1.0968	1.36e-09
ENSG00000142676	RPL11	-0.694396	4.51e-07	-0.318736	0.00670256	-0.482959	0.0433594
ENSG00000162244	RPL29	-1.05732	4.64e-07	-0.864669	2.11e-07	-0.812444	0.000615209
ENSG00000182774	RPS17	-1.20956	4.66e-07	-0.89315	2.17e-05	-0.989731	9.79e-05
ENSG00000139998	RAB15	-0.790201	7.93e-07	-0.67077	6.21e-09	-1.29338	3.1e-13
ENSG00000171224	FAM241B	-1.32745	9.1e-07	-1.09907	9.85e-07	-1.80641	5.77e-14
ENSG00000181754	AMIGO1	-0.822384	9.87e-07	-0.919699	7.11e-08	-1.23988	4.28e-08
ENSG00000185133	INPP5J	-2.37306	9.87e-07	-1.94085	0.00129543	-2.72737	0.00774613
ENSG00000145425	RPS3A	-0.7492	1.16e-06	-0.683355	7.44e-19	-0.780807	6.04e-07
ENSG00000161970	RPL26	-1.37778	1.4e-06	-1.30298	3.28e-08	-1.43564	1.92e-11
ENSG00000237550		-0.837676	2.21e-06	-0.528245	0.00179074	-0.644362	0.00646034
ENSG00000178401	DNAJC22	-0.880754	2.52e-06	-1.29231	5.98e-11	-1.95039	6.61e-13
ENSG00000168778	TCTN2	-0.958119	3.27e-06	-1.25211	1.75e-10	-1.41488	3.72e-09
ENSG00000243199		-1.12486	3.65e-06	-0.774109	0.00670256	-0.793089	0.0138401
ENSG00000132793	LPIN3	-1.27372	3.77e-06	-0.730372	9.52e-05	-1.33558	2.51e-08
ENSG00000141040	ZNF287	-1.62139	4.01e-06	-1.7335	1.15e-05	-1.86721	4.73e-06
ENSG00000022556	NLRP2	-0.722609	4.26e-06	-1.09765	0.000871035	-1.35981	4.34e-07
ENSG00000131095	GFAP	-0.916036	6.13e-06	-1.23185	6e-05	-1.40708	1.78e-06
ENSG00000108379	WNT3	-0.901792	6.8e-06	-1.15522	2.85e-13	-1.27725	5.27e-10
ENSG00000204257	HLA-DMA	-0.877977	7.48e-06	-1.30364	2.71e-24	-1.34013	4.27e-08
ENSG00000114646	CSPG5	-1.22103	7.48e-06	-1.56843	7.06e-13	-1.49371	4.22e-05
ENSG00000173083	HPSE	-0.900839	9.27e-06	-0.849564	1.35e-14	-1.58389	1.62e-15
ENSG00000164953	TMEM67	-0.835286	1.31e-05	-0.595974	0.0262468	-0.665363	0.011696
ENSG00000242193	CRYZL2P	-0.875907	1.43e-05	-1.39653	6.21e-09	-1.55141	1.18e-06
ENSG00000174292	TNK1	-1.07323	1.92e-05	-0.868624	0.00933983	-1.28764	0.000468766
ENSG00000119772	DNMT3A	-0.783135	2.15e-05	-0.923627	1.6e-12	-1.73873	2.44e-16
ENSG00000144455	SUMF1	-0.665579	2.34e-05	-0.739657	1.9e-09	-0.997689	1e-07
ENSG00000179222	MAGED1	-0.709187	2.37e-05	-0.85559	6.68e-10	-1.36663	1.07e-18
ENSG00000196917	HCAR1	-1.20343	2.7e-05	-1.42588	1.9e-09	-1.45199	6.47e-09
ENSG00000149273	RPS3	-0.642317	3.1e-05	-0.463633	0.00229533	-0.602131	0.000986233
ENSG00000131469	RPL27	-0.732228	4.9e-05	-0.541703	1.96e-08	-0.575256	0.0304564
ENSG00000198892	SHISA4	-0.828577	5.23e-05	-1.36548	1.21e-11	-1.57409	1.46e-06
ENSG00000122970	IFT81	-0.657398	5.97e-05	-0.615415	0.0171773	-0.456998	0.0264063
ENSG00000184840	TMED9	-0.542182	7.11e-05	-0.44475	0.00929739	-0.6037	0.000480125
ENSG00000139531	SUOX	-0.859656	8.6e-05	-0.512551	0.00128213	-0.618989	0.00468873
ENSG00000170175	CHRNB1	-0.657118	9.28e-05	-0.788222	7.8e-13	-1.04582	2.55e-12
ENSG00000170464	DNAJC18	-0.783408	0.000104859	-0.582328	3.4e-05	-0.755385	6.67e-05
ENSG00000168497	CAVIN2	-0.561105	0.000107004	-0.49738	0.00300765	-0.505393	0.00633255
ENSG00000204681	GABBR1	-1.30852	0.000108	-0.715467	9e-07	-0.775473	0.000521276
ENSG00000005243	COPZ2	-1.12295	0.000116702	-0.984889	0.0152669	-1.39606	0.0014606
ENSG00000242498	ARPIN	-0.726051	0.00011961	-0.746455	2.17e-09	-1.04006	2.46e-09
ENSG00000115484	CCT4	-0.591456	0.000146312	-0.432799	1.86e-05	-0.53569	0.00130854
ENSG00000139719	VPS33A	-0.689523	0.00016043	-0.526166	0.000154949	-0.916832	3.71e-08
ENSG00000099282	TSPAN15	-0.918872	0.000194651	-0.697744	8.49e-05	-0.835833	0.00015468
ENSG00000181885	CLDN7	-0.855794	0.000198173	-0.772921	8.04e-07	-1.20353	2.94e-08
ENSG00000137094	DNAJB5	-0.612825	0.000198173	-0.66991	3.79e-06	-0.767028	0.000676205
ENSG00000158301	GPRASP2	-0.737441	0.000242124	-0.385486	0.00747825	-0.813494	6.65e-05
ENSG00000198208	RPS6KL1	-0.992209	0.000243598	-0.943016	1.05e-06	-0.791545	0.00866942
ENSG00000124243	BCAS4	-0.70563	0.000243598	-0.696222	0.0020334	-0.802233	0.0043762
ENSG00000224094	RPS24P8	-1.31458	0.000267058	-1.32821	0.0087979	-1.38691	0.00951951
ENSG00000101417	PXMP4	-0.776937	0.000274999	-1.58854	6.03e-11	-1.55376	5.73e-10
ENSG00000063587	ZNF275	-0.720369	0.000289039	-0.739431	2.19e-05	-0.837564	0.00111626
ENSG00000108406	DHX40	-0.62377	0.000326559	-0.535375	0.000768222	-0.428393	0.0227161
ENSG00000150764	DIXDC1	-0.69639	0.000341914	-0.999992	2.36e-05	-1.21735	0.000203129
ENSG00000158856	DMTN	-0.987176	0.000349812	-1.89315	5.96e-06	-2.28234	0.00018933
ENSG00000234284	ZNF879	-1.54971	0.000375436	-1.27203	0.0061135	-2.13851	4.05e-05
ENSG00000178498	DTX3	-0.820908	0.000406465	-1.12852	2.63e-10	-1.44097	5.48e-12
ENSG00000214160	ALG3	-0.638689	0.000417841	-0.639837	0.00429107	-0.601044	0.0114476
ENSG00000196227	FAM217B	-0.804868	0.000447687	-0.41787	0.000503161	-0.562336	0.0238491
ENSG00000124098	FAM210B	-0.621065	0.0004502	-0.538741	4.43e-05	-0.622924	0.000162941
ENSG00000056998	GYG2	-1.70374	0.000454149	-0.802057	0.000139335	-2.01858	3.75e-06
ENSG00000198203	SULT1C2	-1.27434	0.000519621	-1.27141	0.046126	-1.31255	0.0190238
ENSG00000184208	C22orf46	-0.721209	0.000529964	-0.461948	0.000938257	-0.543202	0.0115281
ENSG00000021300	PLEKHB1	-1.27169	0.000553035	-2.0037	4.27e-07	-2.12785	0.000147436
ENSG00000124143	ARHGAP40	-0.765434	0.000554487	-0.559124	0.00331718	-0.496704	0.0264045
ENSG00000213463	SYNJ2BP	-0.626697	0.000601897	-0.445334	0.0136265	-0.5021	0.00666392
ENSG00000272462		-0.915828	0.000645536	-0.480131	0.045172	-0.847041	0.00270004
ENSG00000258289	CHURC1	-0.631462	0.000708114	-0.546192	0.016989	-0.504061	0.012701
ENSG00000168765	GSTM4	-0.628391	0.000712373	-0.930516	1.76e-09	-0.649562	0.00214351
ENSG00000050327	ARHGEF5	-1.06973	0.000722979	-1.1658	1.23e-05	-2.13703	0.000175244
ENSG00000180964	TCEAL8	-0.723204	0.000725546	-0.393249	0.0253831	-0.746686	1.69e-05
ENSG00000131797	CLUHP3	-0.996699	0.000728138	-0.732992	0.00159883	-0.838489	0.00707226
ENSG00000122565	CBX3	-0.635606	0.000739317	-0.414421	0.00257961	-0.465688	0.0229423
ENSG00000163820	FYCO1	-0.591936	0.000778269	-0.426567	0.000323712	-0.749049	0.0016348
ENSG00000144306	SCRN3	-0.691694	0.000778269	-0.553441	0.00401137	-0.465278	0.0232269
ENSG00000143845	ETNK2	-0.787425	0.000778269	-0.508278	0.0267683	-0.743081	0.00808018
ENSG00000132688	NES	-0.690238	0.000895724	-0.830122	9e-09	-1.25331	5.39e-09
ENSG00000119650	IFT43	-0.734892	0.00105323	-0.859875	1.49e-06	-1.04896	0.000480125
ENSG00000181638	ZFP41	-0.829236	0.00109532	-0.468569	0.0141578	-1.03271	0.000192605
ENSG00000133835	HSD17B4	-0.488093	0.00112086	-0.381566	0.00102601	-0.413364	0.0102758
ENSG00000070269	TMEM260	-0.66085	0.00112962	-0.683606	0.00100029	-0.705141	0.00315894
ENSG00000153790	C7orf31	-1.1079	0.00123141	-0.598092	0.00334315	-0.678368	0.0131688
ENSG00000122861	PLAU	-0.505211	0.00129008	-0.686744	2.94e-14	-0.791507	4.14e-07
ENSG00000114923	SLC4A3	-1.5054	0.00140693	-2.12263	5.23e-08	-1.89743	0.00396357
ENSG00000173898	SPTBN2	-0.860354	0.00152506	-1.14715	1.02e-05	-1.43436	3.94e-06
ENSG00000205002	AARD	-1.25685	0.00168623	-1.31093	2.11e-10	-2.08623	2.15e-10
ENSG00000171863	RPS7	-0.571837	0.00168623	-0.339124	0.0436426	-0.487874	0.0437984
ENSG00000079931	MOXD1	-0.754435	0.00172339	-0.98821	4.6e-06	-0.858279	0.00498191
ENSG00000241343	RPL36A	-1.00812	0.00177498	-0.770638	1.14e-05	-0.638427	0.00611117
ENSG00000204650	LINC02210	-0.819417	0.00179727	-1.04674	0.00425986	-1.01886	0.000207479
ENSG00000103351	CLUAP1	-0.674976	0.00191866	-0.686056	0.000357824	-0.545187	0.0244374
ENSG00000138449	SLC40A1	-0.759449	0.00194323	-1.20643	6.9e-07	-1.56555	0.00883387
ENSG00000143416	SELENBP1	-0.652147	0.00197117	-1.33195	8.43e-06	-1.48031	3.19e-05
ENSG00000167333	TRIM68	-0.628253	0.00197117	-0.430985	0.000661798	-0.665661	0.00266374
ENSG00000132563	REEP2	-1.01248	0.00207805	-1.2462	1.29e-13	-1.61237	1.42e-10
ENSG00000230202		-0.910704	0.00208982	-0.780672	0.0312399	-0.731601	0.0118333
ENSG00000137462	TLR2	-0.854321	0.0020966	-1.14754	1.09e-06	-1.3276	0.00046253
ENSG00000169740	ZNF32	-0.647633	0.0020966	-0.382992	0.0216006	-0.724247	0.000956207
ENSG00000184117	NIPSNAP1	-0.495005	0.00244771	-0.554665	0.00011154	-0.817477	4.53e-07
ENSG00000166352	C11orf74	-0.947153	0.00244771	-0.734642	0.00369303	-1.02755	9.29e-05
ENSG00000122378	PRXL2A	-0.477142	0.00244771	-0.275859	0.020621	-0.721521	1.52e-06
ENSG00000100151	PICK1	-0.870593	0.00286395	-1.04706	6.35e-07	-1.74184	1.85e-12
ENSG00000108370	RGS9	-0.773243	0.00286395	-0.494379	0.0067396	-0.813417	0.000516552
ENSG00000133597	ADCK2	-0.72129	0.00286395	-0.44729	0.0389443	-0.901084	8.85e-05
ENSG00000151148	UBE3B	-0.486626	0.00314962	-0.385736	0.000997039	-0.432476	0.00963651
ENSG00000157077	ZFYVE9	-0.605689	0.00322233	-0.289947	0.0169668	-0.526919	0.0394436
ENSG00000269609	RPARP-AS1	-1.03216	0.00327738	-1.21503	2.26e-06	-1.4281	0.00022674
ENSG00000084693	AGBL5	-0.503813	0.00372321	-0.513332	3.77e-05	-0.56462	0.00563414
ENSG00000115226	FNDC4	-1.7995	0.00376362	-0.493371	0.00681707	-0.801751	0.0015714
ENSG00000185436	IFNLR1	-1.28461	0.00376496	-1.0055	9.68e-05	-2.15518	1.16e-06
ENSG00000063180	CA11	-0.954054	0.00390023	-1.38061	1.86e-05	-1.44809	2.41e-05
ENSG00000105559	PLEKHA4	-0.764015	0.00411439	-1.05285	1.42e-06	-1.33384	1.34e-05
ENSG00000188060	RAB42	-1.16617	0.00448848	-1.04601	0.0199754	-1.55542	1.75e-05
ENSG00000169169	CPT1C	-0.838393	0.00450814	-1.12557	2.02e-09	-1.3503	4.29e-09
ENSG00000005379	TSPOAP1	-1.39913	0.00450814	-1.15652	2.74e-06	-1.50731	0.000122892
ENSG00000089177	KIF16B	-0.715406	0.00450814	-0.829943	0.000247831	-1.40379	2.61e-07
ENSG00000132879	FBXO44	-0.972971	0.00471706	-1.54104	1.28e-08	-1.54148	7.69e-06
ENSG00000238105	GOLGA2P5	-0.902967	0.00477427	-0.914594	5.41e-06	-0.799343	0.00177598
ENSG00000165406	2022-03-08	-0.436934	0.00479263	-0.290751	0.03902	-0.455291	0.0212717
ENSG00000198690	FAN1	-0.486864	0.00502327	-0.382993	0.00867736	-0.437536	0.023488
ENSG00000111331	OAS3	-0.481962	0.00526015	-0.667936	4.46e-08	-0.658698	0.00366089
ENSG00000088543	C3orf18	-0.579629	0.00531968	-0.553417	0.000709122	-0.629975	0.00584917
ENSG00000159403	C1R	-0.716841	0.00552169	-1.37882	2.22e-07	-1.80511	2.53e-10
ENSG00000198794	SCAMP5	-0.493301	0.00557984	-0.545213	6.88e-05	-0.815046	8.32e-06
ENSG00000121310	ECHDC2	-0.591283	0.00560132	-0.430609	0.0023687	-0.621076	0.000480125
ENSG00000111261	MANSC1	-0.665557	0.00577416	-0.663808	3.24e-05	-0.645283	0.0025128
ENSG00000203797	DDO	-1.7365	0.00613888	-1.81527	2.85e-05	-0.943179	0.0185337
ENSG00000151117	TMEM86A	-1.06074	0.00628651	-1.30096	0.000484781	-2.10252	0.0010034
ENSG00000101265	RASSF2	-0.802602	0.0068841	-1.0269	8.52e-08	-1.45947	1.71e-05
ENSG00000136943	CTSV	-0.882834	0.00713647	-1.30955	2.45e-11	-1.34536	7.51e-05
ENSG00000133678	TMEM254	-0.63888	0.00739746	-0.598095	0.00246688	-0.56812	0.0208274
ENSG00000108947	EFNB3	-0.959546	0.00742683	-0.904077	0.000944511	-1.79151	0.000147908
ENSG00000156959	LHFPL4	-0.799979	0.00754051	-1.10549	4.49e-05	-1.14886	0.00404648
ENSG00000179913	B3GNT3	-1.06183	0.00792615	-1.40891	1.46e-10	-1.86545	1.48e-07
ENSG00000184307	ZDHHC23	-0.669042	0.00798927	-0.87927	3.51e-05	-0.690885	0.0468678
ENSG00000172828	CES3	-1.07139	0.00820275	-2.43475	1.17e-09	-2.02865	0.00102489
ENSG00000072195	SPEG	-0.9704	0.00823142	-0.667032	3.49e-05	-0.986798	0.000883174
ENSG00000125170	DOK4	-0.887268	0.00869824	-0.500065	0.000681901	-1.90418	2.36e-07
ENSG00000073849	ST6GAL1	-0.517334	0.00908943	-0.540388	8.49e-05	-0.478892	0.0427748
ENSG00000181191	PJA1	-0.506388	0.00919783	-0.553912	0.000426087	-0.717088	0.000803097
ENSG00000265681	RPL17	-1.13481	0.00968702	-0.976527	0.00772589	-1.21382	0.00113404
ENSG00000007968	E2F2	-0.583295	0.00980832	-1.38819	5.23e-08	-1.65713	5.95e-15
ENSG00000204852	TCTN1	-0.674916	0.0101349	-1.12039	1.04e-09	-0.695454	0.00459413
ENSG00000169957	ZNF768	-0.839076	0.0101349	-0.630858	0.000650847	-1.04207	7.51e-07
ENSG00000177932	ZNF354C	-0.644198	0.0101845	-0.764017	0.00012188	-0.615372	0.0235617
ENSG00000137821	LRRC49	-0.655289	0.0106369	-0.770013	0.00216267	-0.758152	0.00200694
ENSG00000166145	SPINT1	-1.03062	0.011219	-1.584	1.16e-06	-2.18896	0.000384479
ENSG00000235437	LINC01278	-0.518886	0.011219	-0.447004	0.0312399	-0.658488	0.000559286
ENSG00000071246	VASH1	-1.0863	0.0117285	-0.999485	0.00148625	-1.68413	8.02e-07
ENSG00000250510	GPR162	-1.15047	0.0117841	-1.41935	8.05e-05	-1.73138	0.000403663
ENSG00000184254	ALDH1A3	-0.635812	0.0118654	-1.0868	0.00010286	-1.50899	0.00230574
ENSG00000213983	AP1G2	-0.573173	0.0118745	-0.778767	3.07e-06	-1.03842	3.86e-08
ENSG00000078804	TP53INP2	-0.463027	0.01262	-0.325535	0.0284267	-0.594008	0.0025185
ENSG00000116157	GPX7	-1.07828	0.0129453	-1.59201	0.0315934	-1.67165	0.00587393
ENSG00000254221	PCDHGB1	-0.535113	0.0131555	-1.08937	0.00112705	-0.973005	0.0278993
ENSG00000010704	HFE	-0.466719	0.0139137	-0.749149	3.69e-06	-0.692181	0.00895083
ENSG00000266208		-0.839755	0.0141181	-0.952297	5.25e-05	-0.967476	0.00120375
ENSG00000141376	BCAS3	-0.501051	0.0141247	-0.545588	4.13e-05	-0.717246	0.00204571
ENSG00000187391	MAGI2	-1.37477	0.0141954	-1.44203	0.00459685	-1.54771	0.00554843
ENSG00000114631	PODXL2	-0.845965	0.0153466	-0.743428	0.000323712	-1.02456	2.31e-05
ENSG00000133805	AMPD3	-0.54596	0.0154343	-0.645855	0.000290823	-0.816589	0.000377084
ENSG00000183762	KREMEN1	-0.653876	0.0155956	-0.995962	0.00279703	-1.50444	4.23e-05
ENSG00000132849	PATJ	-0.565737	0.0158085	-0.665745	5.82e-05	-1.3052	3.72e-09
ENSG00000173218	VANGL1	-0.407354	0.0163224	-0.395723	0.000689423	-0.740286	5.37e-05
ENSG00000083290	ULK2	-0.644896	0.0163334	-1.32609	6.37e-10	-1.08295	0.000480125
ENSG00000225791	TRAM2-AS1	-0.619549	0.0165797	-0.818093	2.05e-05	-0.827751	0.000753055
ENSG00000146267	FAXC	-0.906162	0.0166508	-1.15062	0.00724794	-1.22819	0.00479291
ENSG00000124523	SIRT5	-0.542585	0.0174108	-0.431456	0.00364953	-0.651319	0.00461979
ENSG00000177096	PHETA2	-1.70197	0.0176106	-0.436353	0.0234652	-0.907203	0.00645179
ENSG00000125434	SLC25A35	-0.795184	0.0181154	-1.183	8.4e-06	-1.16795	8.26e-05
ENSG00000124614	RPS10	-0.996503	0.0196826	-0.946044	0.000443934	-0.927918	0.00396357
ENSG00000253304	TMEM200B	-0.534446	0.0198298	-0.885196	3.27e-07	-0.966937	3.63e-05
ENSG00000170608	FOXA3	-1.70895	0.020755	-1.37501	4.42e-06	-1.57212	0.00272369
ENSG00000082458	DLG3	-0.429872	0.0210911	-0.806648	2.57e-08	-1.12755	4.6e-09
ENSG00000227372	TP73-AS1	-1.3849	0.0214926	-1.5964	0.000206816	-1.49981	3.15e-17
ENSG00000145882	PCYOX1L	-0.57892	0.0217539	-0.660736	0.000327883	-0.656805	0.0114631
ENSG00000130755	GMFG	-1.33187	0.021847	-0.889538	2.88e-05	-1.05283	0.00277948
ENSG00000114745	GORASP1	-0.493198	0.0226437	-0.470559	0.00139456	-0.670899	0.000157656
ENSG00000160298	C21orf58	-0.73143	0.0229204	-0.84549	1.86e-05	-0.702393	0.0100427
ENSG00000011143	MKS1	-0.507323	0.0234572	-0.642434	1.08e-05	-0.545801	0.0262501
ENSG00000239697	TNFSF12	-0.748133	0.0244332	-0.807463	0.000460275	-1.21339	3.19e-05
ENSG00000101882	NKAP	-0.460709	0.0246085	-0.325822	0.0498361	-0.389641	0.0491333
ENSG00000174672	BRSK2	-1.33636	0.0248312	-0.986791	0.00260857	-1.8871	0.00392258
ENSG00000138131	LOXL4	-0.524682	0.0253161	-0.644777	5.7e-06	-0.920286	7.56e-05
ENSG00000100626	GALNT16	-0.82342	0.0253272	-0.897054	0.0170416	-1.68335	0.00577082
ENSG00000132718	SYT11	-1.70415	0.0253932	-1.44655	0.000213723	-2.01742	8.32e-06
ENSG00000197122	SRC	-0.529368	0.0255416	-0.89861	3.03e-09	-1.21508	3.93e-10
ENSG00000151065	DCP1B	-0.636617	0.0257406	-0.821548	0.000236132	-0.665163	0.0245814
ENSG00000130413	STK33	-0.563331	0.0278262	-0.857264	1.38e-05	-0.602755	0.00711342
ENSG00000198933	TBKBP1	-0.797755	0.0278262	-0.604778	0.00893717	-1.12425	0.00502591
ENSG00000183486	MX2	-0.780069	0.0287095	-1.15157	0.00139456	-1.31921	0.00261828
ENSG00000166831	RBPMS2	-1.11121	0.0291955	-1.11716	0.00666004	-1.87943	0.000175244
ENSG00000226137	BAIAP2-DT	-0.590667	0.0293302	-1.00342	2.93e-06	-1.09111	9.92e-05
ENSG00000174151	CYB561D1	-0.491207	0.0302496	-0.368939	0.0209361	-0.506295	0.0380039
ENSG00000142082	SIRT3	-0.425109	0.0305207	-0.422057	0.0162355	-0.457802	0.0482552
ENSG00000163214	DHX57	-0.391891	0.0310216	-0.401093	0.0117163	-0.390626	0.0450855
ENSG00000065989	PDE4A	-0.50152	0.032888	-0.40772	0.00338637	-1.01569	4.01e-08
ENSG00000227403	LINC01806	-0.560468	0.0331237	-0.732961	4.29e-05	-0.644859	0.0136056
ENSG00000166548	TK2	-0.429956	0.0334209	-0.583832	1.83e-05	-0.827698	3e-05
ENSG00000130758	MAP3K10	-0.949414	0.0341556	-0.744701	0.00234256	-0.826347	0.00942277
ENSG00000124313	IQSEC2	-0.648141	0.0347881	-0.751257	3.66e-06	-0.751688	0.00461979
ENSG00000197093	GAL3ST4	-1.26281	0.0353665	-1.46929	0.00426115	-1.74513	0.0185421
ENSG00000135378	PRRG4	-0.800797	0.0359059	-1.21283	5.31e-05	-1.16373	0.0333913
ENSG00000162522	KIAA1522	-0.48669	0.0362363	-1.11748	4.39e-16	-1.38148	1.51e-14
ENSG00000168067	MAP4K2	-0.582143	0.0364474	-0.678734	6.84e-06	-1.00108	7.1e-06
ENSG00000003400	CASP10	-0.569743	0.0368352	-0.612469	0.0101019	-0.988634	0.00134248
ENSG00000132031	MATN3	-0.74643	0.0369584	-1.09029	7.34e-07	-0.976519	0.000470109
ENSG00000171160	MORN4	-0.597093	0.0369584	-0.478301	0.0204193	-0.493409	0.0241708
ENSG00000204934	ATP6V0E2-AS1	-0.520671	0.0369584	-0.479112	0.0467824	-0.761876	0.00139819
ENSG00000138613	APH1B	-0.447041	0.0370321	-0.521417	0.000918686	-0.771524	0.000182971
ENSG00000124920	MYRF	-0.598885	0.037257	-0.667949	0.00015848	-0.748614	0.000121941
ENSG00000213366	GSTM2	-0.836285	0.037257	-1.35467	0.000988233	-1.057	0.0399427
ENSG00000174365	SNHG11	-0.68222	0.0372584	-0.865893	0.00107967	-1.1956	6.05e-06
ENSG00000172809	RPL38	-0.651273	0.0377469	-0.820828	1.77e-22	-0.823891	0.00128733
ENSG00000160703	NLRX1	-0.684918	0.0383918	-1.02142	2.65e-05	-0.984104	0.000591139
ENSG00000133640	LRRIQ1	-1.37923	0.039422	-1.37982	0.0477692	-1.67777	0.00229516
ENSG00000161243		-0.438995	0.0400816	-0.727627	4e-07	-1.00415	2.44e-11
ENSG00000049089	COL9A2	-0.894741	0.0400966	-0.997715	0.00522486	-1.53662	0.000155263
ENSG00000169598	DFFB	-0.506002	0.0402065	-0.480228	0.00873374	-0.847624	0.00097681
ENSG00000164114	MAP9	-0.527713	0.0407281	-0.597728	0.0409287	-0.765327	0.000286141
ENSG00000054793	ATP9A	-0.552749	0.0421363	-1.04834	0.000110741	-1.24885	0.00229516
ENSG00000149179	C11orf49	-0.481826	0.0423698	-0.646717	5.5e-05	-0.516666	0.0180473
ENSG00000167600	CYP2S1	-1.01093	0.0432745	-1.04399	1.44e-06	-1.54864	0.000175244
ENSG00000204789	ZNF204P	-1.36882	0.0434355	-1.12665	0.0026837	-1.05788	0.00958208
ENSG00000100228	RAB36	-0.641131	0.0449518	-1.18507	0.00355381	-1.15282	0.00254685
ENSG00000214784		-0.96239	0.0452183	-1.28633	0.00537548	-1.15095	0.0415158
ENSG00000162458	FBLIM1	-0.535255	0.046221	-0.577324	7.91e-07	-0.962584	5.88e-06
ENSG00000196659	TTC30B	-0.901153	0.0468536	-1.24452	2.31e-05	-1.41928	0.00372081
ENSG00000135622	SEMA4F	-0.516604	0.0471311	-0.517058	0.000651915	-1.15131	3.09e-09
ENSG00000113721	PDGFRB	-0.677329	0.0475003	-0.946863	0.00454612	-0.837294	0.000725266
ENSG00000170962	PDGFD	-0.722753	0.0480476	-1.24057	4.21e-07	-1.17611	8.23e-05
ENSG00000156711	MAPK13	-0.37914	0.0484402	-0.936753	7.37e-12	-0.757362	2.01e-06

## Sheet: Supplementary File 1d
Supplementary File 1d. Enriched pathways of differentially expressed genes (DEGs) after WDR5 knockdown in LM2, BrM3, BoM, or all three cell lines (common).
Enriched pathways, significance, combined score, and overlapping genes are shown.
Category	Enriched Pathways	Overlap	total	P.value	Adjusted.P.value	Odds.Ratio	Combined.Score	Overlapping Genes
Common_DEG_down	Cytoplasmic Ribosomal Proteins WP477	23	89	5.95949e-24	1.02503e-21	29.4313	1573.9	RPL5;RPL32;RPS7;RPL31;RPL34;RPL11;RPL36A;RPS3A;RPL9;RPL7;RPS14;RPS17;RPS18;RPL37A;RPS3;RPL38;RPL27;RPL37;RPL26;RPL29;RPS10;RPL17;RPS24
Common_DEG_down	Genes related to primary cilium development (based on CRISPR) WP4536	8	103	5.3853e-05	0.00463136	6.67199	65.5806	IFT43;TTC30B;IFT81;TCTN2;TMEM67;TCTN1;MKS1;CLUAP1
Common_DEG_down	NAD+ metabolism WP3644	2	16	0.0174007	0.584326	11.0967	44.9556	SIRT5;SIRT3
Common_DEG_down	Platelet-mediated interactions with vascular and circulating cells WP4462	2	17	0.0195563	0.584326	10.3564	40.747	CD40;TLR2
Common_DEG_down	Robo4 and VEGF Signaling Pathways Crosstalk WP3943	1	6	0.0743927	0.584326	15.4816	40.2273	SRC
Common_DEG_up	Cytoplasmic Ribosomal Proteins WP477	9	89	2.16425e-09	2.53218e-07	21.0195	419.363	RPL4;RPS25;RPS27;RPL21;RPLP0;RPL14;RPSA;UBA52;RPS13
Common_DEG_up	ERK Pathway in Huntington's Disease WP3853	2	14	0.00285086	0.065017	29.3112	171.768	BDNF;CASP3
Common_DEG_up	Vitamin B6-dependent and responsive disorders WP4228	1	5	0.0284239	0.195623	43.5987	155.234	AASS
Common_DEG_up	Robo4 and VEGF Signaling Pathways Crosstalk WP3943	1	6	0.0340118	0.221077	34.8772	117.921	SLIT2
Common_DEG_up	Urea cycle and metabolism of amino groups WP497	2	20	0.00581994	0.0851166	19.5349	100.536	GLUD1;ODC1
LM2_DEG_down	Extracellular vesicles in the crosstalk of cardiac cells WP4300	2	19	0.00146449	0.068831	40.4118	263.737	IL6;SORBS2
LM2_DEG_down	Phase I biotransformations, non P450 WP136	1	8	0.0237535	0.248092	48.2639	180.508	LIPA
LM2_DEG_down	Insulin signalling in human adipocytes (diabetic condition) WP3635	1	8	0.0237535	0.248092	48.2639	180.508	RPS6
LM2_DEG_down	Insulin signalling in human adipocytes (normal condition) WP3634	1	8	0.0237535	0.248092	48.2639	180.508	RPS6
LM2_DEG_down	Interferon type I signaling pathways WP585	3	54	0.000571003	0.0536743	20.5253	153.285	RPS6;RACK1;PTPN6
LM2_DEG_up	Dual hijack model of Vif in HIV infection WP3300	1	8	0.019436	0.191725	59.3571	233.905	UBB
LM2_DEG_up	Benzo(a)pyrene metabolism WP696	1	9	0.0218393	0.191725	51.9349	198.601	AKR1C3
LM2_DEG_up	Bone Morphogenic Protein (BMP) Signalling and Regulation WP1425	1	12	0.0290147	0.191725	37.7652	133.687	TOB1
LM2_DEG_up	Glycogen Synthesis and Degradation WP500	2	40	0.00432201	0.131821	22.299	121.396	PPP2R2C;HKDC1
LM2_DEG_up	Vitamin B12 Disorders WP4271	1	13	0.0313951	0.191725	34.6163	119.811	CUBN
BrM3_DEG_down	Sulindac Metabolic Pathway WP2542	2	5	0.00419893	0.333115	31.2998	171.301	MSRB2;CYP1B1
BrM3_DEG_down	Degradation pathway of sphingolipids, including diseases WP4153	2	9	0.0142993	0.745109	13.4114	56.9657	ARSA;HEXA
BrM3_DEG_down	Cytokines and Inflammatory Response WP530	4	26	0.00196991	0.305632	8.56911	53.3836	CSF2;CSF1;IL1B;HLA-DRB1
BrM3_DEG_down	Vitamin D Metabolism WP1531	2	10	0.0176287	0.745109	11.7344	47.3862	CYP27A1;CYP2R1
BrM3_DEG_down	Development of pulmonary dendritic cells and macrophage subsets WP3892	2	13	0.0293193	0.745109	8.53281	30.1166	CSF2;CSF1
BrM3_DEG_up	Metabolic reprogramming in colon cancer WP4290	13	42	5.40334e-08	4.97107e-06	8.87119	148.448	PDHA1;MDH2;PGAM1;PDHB;ENO1;PGD;PAICS;ACLY;LDHA;PKM;PGK1;GART;PSPH
BrM3_DEG_up	mRNA Processing WP411	27	126	5.76599e-11	1.06094e-08	5.45685	128.653	HNRNPU;YBX1;PPM1G;SNRPD1;TRA2B;SNRPD3;HNRNPA1;RBM17;PRMT1;NONO;HNRNPL;PRPF4;HNRNPM;SNRNP40;HNRNPK;PHF5A;PRPF3;XRN2;SNRPG;HNRNPD;CD2BP2;SRSF4;SNRPE;SNRPF;HNRNPC;RBMX;SRSF9
BrM3_DEG_up	RalA downstream regulated genes WP2290	5	12	0.000160373	0.00226989	14.0348	122.636	CDC42;RAC1;HRAS;YBX3;EXOC2
BrM3_DEG_up	TGF-beta Signaling Pathway WP366	26	132	9.12388e-10	1.1192e-07	4.90074	102.009	SHC1;NEDD4L;ETS1;CDC42;CCND1;SIN3A;PRKAR2A;EP300;RAC1;PAK2;MAP2K3;TGIF1;KLF10;TRAP1;MEF2C;JUN;MMP1;CAV1;MAPK14;RHOA;DAB2;ZEB2;KLF6;STRAP;GRB2;RAF1
BrM3_DEG_up	VEGFA-VEGFR2 Signaling Pathway WP3888	39	236	1.84546e-11	6.79131e-09	3.99118	98.6449	SHC1;IQGAP1;ARRB2;FOXO3;ETS1;ACACA;CDC42;CCND1;CFL1;KDR;CAPN2;ELOA;FYN;RAC1;HRAS;PAK2;MAP3K5;TEAD4;MAP2K3;MEF2C;JUN;RAB4A;STAT1;CAV1;STAT3;STAM;MAPK14;SOD2;F3;RHOA;NFKB1;AFDN;NCL;PTPN9;GRB2;EZR;RAF1;ATF4;ARF6
BoM_DEG_down	Cell Differentiation - Index WP2029	2	13	0.00913478	0.472809	16.0414	75.325	HDAC5;MEF2D
BoM_DEG_down	Vitamin B6-dependent and responsive disorders WP4228	1	5	0.0552426	0.558848	21.9667	63.6159	PIGV
BoM_DEG_down	miR-517 relationship with ARCN1 and USP1 WP3596	1	5	0.0552426	0.558848	21.9667	63.6159	CDKN1A
BoM_DEG_down	Metabolic pathway of LDL, HDL and TG, including diseases WP4522	2	16	0.0137444	0.472809	12.602	54.0265	SCARB1;LPL
BoM_DEG_down	Rett syndrome causing genes WP4312	4	48	0.00209279	0.359961	8.07944	49.8441	GNAO1;HDAC5;GABBR2;CHD4
BoM_DEG_up	Interactome of polycomb repressive complex 2 (PRC2) WP2916	2	16	0.014921	0.477767	12.0574	50.7011	MORC3;BCLAF1
BoM_DEG_up	Somatroph axis (GH) and its relationship to dietary restriction and aging WP4186	1	6	0.068752	0.589349	16.8162	45.0211	PTEN
BoM_DEG_up	Methionine De Novo and Salvage Pathway WP3580	2	22	0.0274251	0.589349	8.43761	30.3441	MAT2A;SRM
BoM_DEG_up	Retinoblastoma Gene in Cancer WP2446	5	87	0.00369593	0.477767	5.19533	29.0966	PLK4;NPAT;ANLN;HLTF;ZNF655
BoM_DEG_up	Caloric restriction and aging WP4191	1	8	0.0906068	0.589349	12.0103	28.8395	NAMPT

## Sheet: Supplementary File 1e
Supplementary File 1e. List of cloning oligos.
wcg	sequence	oligo	type
WCG419	GGGGACAAGTTTGTACAAAAAAGCAGGCTTCGAAGGAGATAGAACCATGGCGACGGAGGAGAAGAAGCCC	attB1-WDR5	cloning
WCG420	GGGGACCACTTTGTACAAGAAAGCTGGGTCTACTTGTCATCGTCATCCTTGTAGTCGA	attB2-WDR5	cloning
WCG421	AGAGTGGCTGGCATCCAGCAGCGCCGACAAGCTTATTAAAATTTGGGGCG	WDR5-WCG383-silent-FWD	cloning
WCG422	TTTAATAAGCTTGTCGGCGCTGCTGGATGCCAGCCACTCTCCATTCGGGC	WDR5-WCG383-silent-REV	cloning
WCG423	GATGTCGTGATCAGCACCGCCTGCCATCCCACAGAAAACATCATCGCCTC	WDR5-4C2-silent-FWD	cloning
WCG424	GATGTTTTCTGTGGGATGGCAGGCGGTGCTGATCACGACATCTGTGTGGC	WDR5-4C2-silent-REV	cloning
WCG427	GGGACACAGTAATTATGTCGCCTGCTGCAACTTCAATCCCCAGTCCAACC	WDR5-F133A-FWD	cloning
WCG428	GGGATTGAAGTTGCAGCAGGCGACATAATTACTGTGTCCCTTCAGGGTTT	WDR5-F133A-REV	cloning
WCG429	TTTTGTGAAGTTCTCCCCGGCCGGCAAATACATCCTGGCCGCCACGCTGG	WDR5-N225A-FWD	cloning
WCG430	GGCCAGGATGTATTTGCCGGCCGGGGAGAACTTCACAAAAGACACGGGGG	WDR5-N225A-REV	cloning
WCG431	ATATTTGCCAATTTCTCTGAGACTGGTGGGAAGTGGATTGTGTCTGGCTC	WDR5-V268E-FWD	cloning
WCG432	CAATCCACTTCCCACCAGTCTCAGAGAAATTGGCAAATATGCAGTATTTC	WDR5-V268E-REV	cloning
WCG433	AAAGCAGGCTTCGAAGGAGATAGAACCATGAGCAAGCCTACACCTGTGAAGCCAAACTAT	WDR5-1-25Delta-FWD	cloning
WCG434	ATAGTTTGGCTTCACAGGTGTAGGCTTGCTCATGGTTCTATCTCCTTCGAAGCCTGCTTT	WDR5-1-25Delta-REV	cloning
WCG435	ATGGCGACGGAGGAGAAGCAGCCCGAGACCGAGGCCGCCAGAGCACAGCC	WDR5-K7Q-FWD	cloning
WCG436	TGGCGGCCTCGGTCTCGGGCTGCTTCTCCTCCGTCGCCATGGTTCTATCT	WDR5-K7Q-REV	cloning

## Sheet: Supplementary File 1f
Supplementary File 1f. List of primers used for RT-qPCR.
primer	sequence	direction
RPL31	CAGAATGGCTCCCGCAAA	fwd
RPL31	TGGCAGAACGGCCCTTT	rev
RPL7	GAGGATGGCAAGAAAAGCTGGC	fwd
RPL7	CGAACCTTTGGGCTCACTCCAT	rev
RPL32	gaagttcctggtccacaacg	fwd
RPL32	gcgatctcggcacagtaag	rev
RPS14	ATGTTGGCTGCCCAG	fwd
RPS14	GGTCTTGGTCCTATTTCCTC	rev
RPL9	GCACAGTTATCGTGAAGGGC	fwd
RPL9	TTACCCCACCATTTGTCAACC	rev
RPS24	CTGTCTCAGCCTCCCAGATA	fwd
RPS24	ACATGGCGAAACCACGTA	rev
Rpl31	AGATGTGCGCATTGACACCAGG	fwd
Rpl31	ACAGGCACGTAAGTTACCAGCG	rev
Rpl7	TCGCAGAGTTGAAGGTGAAGCG	fwd
Rpl7	CCATCCGAATCTCAGTGCGGTA	rev
Rpl32	ATCAGGCACCAGTCAGACCGAT	fwd
Rpl32	GTTGCTCCCATAACCGATGTTGG	rev
Rps14	GTGTTTGGTGTCTGCCACATCTT	fwd
Rps14	GACTCATCTCGGTCAGCCTTCA	rev
Mpp2	ACCTGTATGGCACACGGATCGA	fwd
Mpp2	AGGAGCCTCTATGAACACCACG	rev
Rpl9	CATCAACGTGGAGCTGAGTCTTC	fwd
Rpl9	GACCGCATCTTGTATCGGAAGC	rev
Rps24	TGGTGGCAAGACCACTGGCTTT	fwd
Rps24	CTGTTCTTGCGTTCCTTTCGCTG	rev
RPL7_promoter_WDR5_1	GGGATCTCCAAAACCTCCGT	fwd
RPL7_promoter_WDR5_1	TGCTTGATTGTGAACGCTGTG	rev
RPL7_promoter_WDR5_2	CCGAAAGACCCTCTACCGAG	fwd
RPL7_promoter_WDR5_2	AACGAGATGTCGGGTTGGAA	rev
RPL7_downstream_1	TATGCAATTACATCCCCCACCA	fwd
RPL7_downstream_1	GGAGGCGCCTTATTGGGAT	rev
RPL7_downstream_2	CAGCTTTTCTTGCCATCCTCG	fwd
RPL7_downstream_2	TGGCATTGCTAATTGTGATTGAG	rev

## Sheet: Supplementary File 1g
Supplementary File 1g. List of barcode qPCR primers.
barcode	sequence	direction
ATF2	TTGGAAGACCTCATGCTGCG	fwd
ATF2	ATGCACATCATTCCCCTCGC	rev
BAZ2A	GGGTGCGTATTTATCCGTTTT	fwd
BAZ2A	CCCCACAAATAAAGAACAGCA	rev
BAZ2B	CGACAATAGTCGTCGTGCCA	fwd
BAZ2B	CACAACGCGACGCTACGA	rev
BRD2	GGATTCTGGTGTTGCGCTTG	fwd
BRD2	CCCAAACCCATGAACACGGA	rev
BRD3	CTCCGGCGTGGGAGATAC	fwd
BRD3	GAGCTCCGACAGCCTAAACG	rev
BRD9	GAGTTATATAGCAGCAGCCGTC	fwd
BRD9	GCAAGTTGAAACCATCAACGCA	rev
BRPF1	GTTTGGGTTGGCTTGGTCAGTT	fwd
BRPF1	GACCACACCCATCAGACGTAATAA	rev
BRPF3	ATGCGTGTATTTCGTGTTGTGTG	fwd
BRPF3	AGGTAATACGACTCACGATAGGGC	rev
BUD31	TGGAAGACATCTGCGTGGTATT	fwd
BUD31	CGCGCAAACCTAAAGGCATA	rev
CARM1	TACCTTGGCGGGGGTAGATT	fwd
CARM1	AAATACCGCAGGCACACACA	rev
CBX7	CGGACCATCGTTGGAACATCT	fwd
CBX7	TCCGCGTCGATCCTAGGGAA	rev
CBX8	GCTTAGCATTTCCGGTGTCG	fwd
CBX8	GACTCACTTAGGGCCCCAAC	rev
CHEK1	ACTATGGGTGCTGTCCGTTC	fwd
CHEK1	ACTAAACCGTGGACCCTCCT	rev
CREBBP	TTCTGTTGTGGGTCCTTCTTC	fwd
CREBBP	TCAACTTATAAGGCCAGAACACC	rev
CSNK2A1	AGCGAGCCAATTGAAGGTAG	fwd
CSNK2A1	TGGACAGCAATGTGAAAGTGT	rev
CTSL	GTGAATCGGGAAGGATCGCC	fwd
CTSL	TCACCAGTCGTTCAGGTCG	rev
DAXX	TTGGATTAGGTCCGCGTTGG	fwd
DAXX	AGGGCCCCAAACTCAAATAACA	rev
DNMT3A	TTGGGCGTTGTTCATTTTC	fwd
DNMT3A	AAACGCAGGACACAAATTACC	rev
DNMT3B	CGGCCAGTTGACTTCTCTTT	fwd
DNMT3B	CCATAGACGGCGAACCAC	rev
DOT1L	TCGAGTTGGCTATGGTGTTG	fwd
DOT1L	GCCCCAAATAAACAAAATGC	rev
EHMT2	GTTTGAGTGTTGACGCCTGG	fwd
EHMT2	AGGGCCCTAAACACTAGCCG	rev
EP300	GTGTTATTGCTCCCGCTGTT	fwd
EP300	GCACAAATCACACCCACAAG	rev
EZH1	TGTTCTTCCTGCGTTTTACTTTTGG	fwd
EZH1	CGACCCGAAACAACACGTACA	rev
FOXO1	CGAGCCAATTGAGCTAAACA	fwd
FOXO1	CAGAGAGTCTTCCTGGAAAGAGA	rev
FOXO3	CGAGCCAATTGGAGGTAGAGAT	fwd
FOXO3	CTGAACGCTTACTGAACAAC	rev
HDAC7	GTGGGCTCAATACTCTGTTTCC	fwd
HDAC7	ACTATAGGGCCCGGTACACAA	rev
HMGA2	CCGGCCCAGTTATCGGAATG	fwd
HMGA2	GCGTCGATCCTAGGGACTG	rev
JHDM1D	CTACCTGGAAAAGCCGACAA	fwd
JHDM1D	CACATATGCGCTCCTTTTCTT	rev
KAT2A	TCGGTTGTGTGGTTCTAGGGT	fwd
KAT2A	CTTACGCGTCCTAGGTATACGA	rev
KAT2B	GGCCCGCTGGTTTCCT	fwd
KAT2B	CGCGTCGATCCTAGGTCC	rev
KAT5	ATATGGCGGGTGTATTTTTGGG	fwd
KAT5	AAACCACAACGAAACGAACCC	rev
KDM1A	TGCTTGTGTTTTCGTGGTGG	fwd
KDM1A	TTAAGCCCTCCCAACCAAGC	rev
KDM1B	TCTTTGGTTGGTGGGTGTTACATAG	fwd
KDM1B	TAACACGTGCACAACCACAAAAAC	rev
KDM2A	CTGGTTTGGTGAGTATCCAGT	fwd
KDM2A	ACCAACCAAAGACCAAGCCA	rev
KDM2B	TTGGCCGGCCCAATGC	fwd
KDM2B	CCTAGGAGATAGCCACGAACG	rev
KDM3A	GCTTTGGATCTCTCGAAAGCCT	fwd
KDM3A	GGGTCCTCTCACCAATGATGTT	rev
KDM4B	CACTGAGGTTCGTCGTGTGT	fwd
KDM4B	GAAGAACCTCCCGAACAACA	rev
KDM4C	TATTGTTTATTCATCGGTTGCCTCT	fwd
KDM4C	CCCAGAACACAGAACCAACATAG	rev
KDM4D	GCTTGGGTCTTTTGCTCAAT	fwd
KDM4D	CCCACTGTGTCGAACAAACA	rev
KDM5A	CATCGGGTCTGAGCTTGTC	fwd
KDM5A	TGGTAGGCGTCTGCAATATG	rev
KDM5C	CGCAAATGCTTGGCAGTTAATTC	fwd
KDM5C	GGCCCAATATCAACATCACAAAGA	rev
KDM6A	TATGACGGTCCCCGCGATTA	fwd
KDM6A	TATACAAGCCCTCAACCCCG	rev
KDM6B	TCCTTTTTCTGCGCTATGGT	fwd
KDM6B	TGACTAGTAAACAACCCTCAAAAA	rev
KDM7A	ACGGTGGTTATGGTTTCTGTGTC	fwd
KDM7A	ACCAAACAACCTATCACACCCAA	rev
KMT2A	TCTTCCGCCGGTTATTTAGGT	fwd
KMT2A	GCCCTCCCATCCCATATCAC	rev
L3MBTL3	TTCTTTTGGAGTTTGCTCTTGTGT	fwd
L3MBTL3	CCTCAAAAAGTGCGAGCAAGGG	rev
MCM6	GACGTGAGTGTGAAAGATAGGGA	fwd
MCM6	GGGTTTGAACTAAAGATGTTTCCCA	rev
MECOM	GCAATGTGATCAGCTTTGGACT	fwd
MECOM	CGCGTCGATCCTAGGCTTTC	rev
MECP2	GCAGGGGCTCCCTGTATC	fwd
MECP2	TCCACAAATCAGCCAACAGA	rev
MTA1	GGTTGAGCGCGTCGCTTATT	fwd
MTA1	CTCACTATAGGGCCCAGACCA	rev
MYC	GTCTGCGCTATGGTTTGGTT	fwd
MYC	CCCACACACCTACCGAAAAA	rev
NAT10	TAGCACTGAAAGGGGTTCGAC	fwd
NAT10	TGACAACTGGCTACCGCAC	rev
NCOA1	CCATTGTTTGCATGTTCCTG	fwd
NCOA1	CCACACAACACGAAATACACG	rev
NCOA3	GTGGGCACCTGGGTAATAAA	fwd
NCOA3	CCCTGCACACAAGGAATAAAA	rev
NCOR2	AACTTCCGGTGCTGTCGTTT	fwd
NCOR2	CGCGTCCTAGGTAATACGACTCA	rev
NFYA	CCGGCCATCTTTTCTGTTTA	fwd
NFYA	GAAAGGGAAACAACCCACAA	rev
PADI4	AGTCTTTACGTGGCACATTTTC	fwd
PADI4	TGAGGCTTTACCAGGCAAG	rev
PBRM1	CTCGCGTGATGTTGATCAGGT	fwd
PBRM1	GCCCACCGCCATAACTACA	rev
PHF8	CCGGCCAGCTATTTGTTTTGTT	fwd
PHF8	CGATAGAGAGTATATTCACTTGCCA	rev
PPARGC1A	CCATGGTCGTTTATGTCAGC	fwd
PPARGC1A	CCCATCCAGAGCCAGAGAT	rev
PRDM5	CCGCGTGGAGAGCTTAGTTA	fwd
PRDM5	TAATACGCCACCTCCGACCT	rev
PRKDC	TATGCAGGTCTTGTGGCTGA	fwd
PRKDC	CGCAACGAGGACAACATAAC	rev
PRMT1	CAATTGGAAGACTAATGCGGC	fwd
PRMT1	AACTAACCCAGACACAATTGGC	rev
PRMT3	GCTGCTCGCACGTACATATT	fwd
PRMT3	GCCCAGATACACATAGGCCG	rev
PRMT7	GCCGAGGTGGATTTCGTTTT	fwd
PRMT7	TAGGGCCCAACAAATAGTCCC	rev
SAE2	CGCGTGGGTTTGTAGACTTT	fwd
SAE2	GCCCAACAACGAAATACTGG	rev
SETD1A	TCGTCGTGCCATGTCGTAG	fwd
SETD1A	GACTCACTATAGGATGCCCCC	rev
SETD7	TCGTTTGATGCGTTATGTTGTGG	fwd
SETD7	CCCGTTGTGCCAATCAAGCG	rev
SETD8	GATTGTGCTGCGCGGGTTA	fwd
SETD8	CTATAGGGCCCACGCAGAAAC	rev
SIRT2	GCGTTCTTGTAGAACTTCGTCG	fwd
SIRT2	TATAGGGCCCGACACAACG	rev
SIRT3	TTGGGTTTGGGTGTTCGTAT	fwd
SIRT3	GGACCACCATGCAAAATGTA	rev
SMARCA2	ACATGCCTGGGTTGCTGT	fwd
SMARCA2	ATAGGGCCCAAAGACGAAAA	rev
SMARCA4	TGGTACTTGTGTGCGTGGAT	fwd
SMARCA4	GCCAGGAACACACCACAAAC	rev
SMYD3	TCTGTGTTGTGGCATTTGGC	fwd
SMYD3	AGGAACAGGCCAGCTGAAAA	rev
STAMBP	TGTAGGGCCCTTTTTATGAGC	fwd
STAMBP	CAAAAGGAAATATGCCTATGAACG	rev
SUV39H1	GCCGGCCATCTTCTTCTTTC	fwd
SUV39H1	CAAGTGCGAAACCAAAAGCC	rev
TAF1	AGCGAGCCAATTGTCATGGAGA	fwd
TAF1	CTAGTCCAAGTGGAGTCTGCCT	rev
TBL1X	GCGGCCGGCCACATTTATAC	fwd
TBL1X	CGATCACACTATCTCCTGCGT	rev
TNKS	CCAATTGCTGTCTAGGCTGA	fwd
TNKS	GCGTCCAGTTCCATTTCACT	rev
TRDMT1	GGCCATTTCACTTCCTTGTG	fwd
TRDMT1	GCCCAACCAGCAAAATAAAA	rev
TRIM24	GCCTTGTAGTCTGTGGTGGT	fwd
TRIM24	CCCCTCACCATATCCGCAAG	rev
TRIM28	AGCTGATGAATAACCTAGGATCGAC	fwd
TRIM28	ATCTTACGCGTGTCCGC	rev
TRIM33	GTGGCCGTGGTTATTCTTTACT	fwd
TRIM33	TCACTATAGGGCCCCACAGT	rev
UBE2I	TGGTTAAGCCTCAGGTCGTAT	fwd
UBE2I	CTCACTATAGGGCCCAAACGATA	rev
WDR5	CGAGGTTTCTGGGCTTGCTC	fwd
WDR5	AGGATCACCGGAACGAACTT	rev
YY1	TTCCGGGGTTGTCTTGGG	fwd
YY1	ACCAAAAGATCAACCACCCAAG	rev
